# The prothrombotic state in atrial fibrillation: pathophysiological and management implications

Ahsan A. Khan<sup>1</sup> and Gregory Y.H. Lip<sup>1,2,3\*</sup>

<sup>1</sup>Institute of Cardiovascular Sciences, University of Birmingham, City Hospital, Dudley Road, Birmingham, B18 7QH, UK; <sup>2</sup>Liverpool Centre for Cardiovascular Science, University of Liverpool and Liverpool Heart & Chest Hospital, Liverpool, UK; and <sup>3</sup>Aalborg Thrombosis Research Unit, Department of Clinical Medicine, Faculty of Health, Aalborg University, Aalborg, Denmark

Received 4 July 2018; revised 8 October 2018; editorial decision 13 October 2018; accepted 30 October 2018; online publish-ahead-of-print 2 November 2018

## Abstract

Atrial fibrillation (AF) is the commonest sustained cardiac arrhythmia and is associated with significant morbidity and mortality. There is plenty of evidence available to support the presence of a prothrombotic or hypercoagulable state in AF, but the contributory factors are multifactorial and cannot simply be explained by blood stasis. Abnormal changes in atrial wall (anatomical and structural, as 'vessel wall abnormalities'), the presence of spontaneous echo contrast to signify abnormal changes in flow and stasis ('flow abnormalities'), and abnormal changes in coagulation, platelet, and other pathophysiologic pathways ('abnormalities of blood constituents') are well documented in AF. The presence of these components therefore fulfils Virchow's triad for thrombogenesis. In this review, we present an overview of the established and professed pathophysiological mechanisms for thrombogenesis in AF and its management implications.

## Keywords

Atrial fibrillation • Prothrombotic state • Hypercoagulable • Thromboembolism

## 1. Introduction

Atrial fibrillation (AF) is an independent risk factor for thromboembolism and stroke, leading to an approximate three- to five-fold excess risk, and the prevention of thromboembolism is the cornerstone of AF management.<sup>1</sup> In addition to the haemodynamic changes associated with this arrhythmia, there are multiple causes to explain the unfavourable thromboembolic effects of AF. These include malfunctioning of the clotting cascade, inappropriate/excessive platelet activation, abnormal haemostasis process along with aberrant blood stasis, and presence of structural heart disease.<sup>2</sup>

The predisposition to thrombus formation (thrombogenesis) in AF can be described in relation to Virchow's triad for thrombus formation, such as abnormal blood flow, abnormal vessel structure, and abnormal blood constituents.<sup>2</sup> While Virchow originally described the abnormalities in relation to venous thrombosis, the triad of abnormalities can be applied to AF, as follows: (i) *Abnormal blood flow* in AF is evident within dilated cardiac chambers and the association with heart failure, with stasis and reduced left atrial appendage (LAA) velocities, and the presence of spontaneous echo contrast (SEC); (ii) *Abnormal vessel wall* is recognized as endothelial or endocardial damage or dysfunction (and related structural abnormal changes), with an increased risk of thromboembolism with structural heart disease; and (iii) *Abnormal blood constituents* with abnormalities of coagulation, fibrinolysis and platelets.<sup>2,3</sup>

By such fulfilment of Virchow's triad for thrombogenesis, AF therefore leads to a hypercoagulable state, a concept that was first proposed in

1995, with the associated implications for clinical practice.<sup>2,4</sup> In this review article, we present an overview of the established and professed pathophysiological mechanisms for thrombogenesis in AF and its management implications.

## 2. Anatomical and structural considerations

### 2.1 Atrial structure and function: the LAA and atrial wall

Each atrium is attached to a hollow structure known as an appendage. The LAA is the remnant of the embryonic left atrium, while the smooth-walled left atrium is derived from the primaeval pulmonary vein and its branches. The LAA is largely considered to be non-functional. However, pulse Doppler echocardiography has shown LAA to be an actively contracting structure with its prominent muscular trabeculations.<sup>5</sup>

The LAA is considered a key site for thrombus formation in patients with AF.<sup>6</sup> It has a narrow inlet and is long, thus providing ideal conditions for blood stasis, so unsurprisingly the LAA is the major site of intra-atrial thrombus formation even in patients with sinus rhythm.<sup>7,8</sup> In a transoesophageal echocardiogram (TOE) study which included 137 patients with AF and a recent embolic event, about one-fifth had evidence of thrombus in the LAA.<sup>9</sup> Another pooled analysis of 23 studies looking at 4792 patients with AF who underwent TOE, cardiac surgery or autopsy

\* Corresponding author. Tel: +44 151 794 9020, E-mail: gregory.lip@liverpool.ac.uk

Published on behalf of the European Society of Cardiology. All rights reserved. © The Author(s) 2018. For permissions, please email: journals.permissions@oup.com.

showed that 14% had left atrial (LA) thrombi with majority originating in LAA.<sup>7</sup>

Late gadolinium enhancement cardiac magnetic resonance (CMR) imaging is a useful tool to detect LAA structural dysfunction. For example, Akoum *et al.*<sup>10</sup> investigated 178 patients with AF and showed that LAA fibrosis on CMR imaging was associated with reduced flow velocities in LAA, suggesting that such fibrotic changes of the LAA appendage can be associated with blood stasis, subsequent thrombus formation, and eventually increased stroke risk.

At the structural level, Goldsmith *et al.*<sup>11</sup> have described severe changes on the endocardium within the LAA compared with the right atrial appendage (RAA) on scanning electron microscopy, especially in AF when compared with sinus rhythm. In another study, Masawa *et al.*<sup>12</sup> have described LAA as a 'rough endocardium' macroscopically with a crumpled facade and noted several little areas of erosion of the endothelium and clusters of clot within LAA in patients with AF and cerebral embolism.

Frustaci *et al.*<sup>13</sup> performed endomyocardial biopsies and established abnormal atrial histology, which was present uniformly in patients with AF: myocarditis was evident in 66% (active in 25%), non-inflammatory focal cardiomyopathy in 17% and patchy fibrosis in 17%. Of note, these changes were all found in atria and not in ventricles. These findings were further confirmed by Boldt *et al.*<sup>14</sup> who also demonstrated fibrosis related changes in LA tissue in the setting of AF.

Echocardiography is a useful non-invasive tool to assess LAA function, morphology, and orifice area and some of these measurements are found to be directly correlated with thromboembolism risks (see Table 1). Changes in the morphology of the LAA and the left atrium occur as a result of AF, which can be correlated to subsequent thromboembolism.<sup>3</sup>

Several clinical trials have assessed the benefit of closing LAA in reducing stroke risk in patients with AF but with mixed results thus far.<sup>33,34</sup> The LAA is also a source of AF development, with arrhythmias initiating from LAA, as oppose to the more conventional location of pulmonary veins.<sup>35</sup>

## 2.2 Other structural considerations

Changes in the left ventricle can also affect LAA. For example, Doukky *et al.*<sup>36</sup> conducted a retrospective cohort study of 297 patients with AF who underwent TOE to evaluate for LA appendage thrombus (LAAT) and also found that B-type natriuretic peptide (BNP, indicating left ventricular wall stress) was an independent predictor of LAAT in AF.

## 3. Abnormal blood stasis

AF leads to inefficient atrial systolic function which leads to increased blood stasis; this effect is more evident in the elderly, where atrial 'kick' may account for a third of the stroke volume.<sup>37</sup> Prolonged duration of AF promotes increasing LA dilatation thus enhancing the environment for stasis.<sup>38</sup> LA enlargement is an independent risk factor for stroke in the general population and LA dilatation is further enhanced in the presence of mitral stenosis, leading to further stasis, and a propensity to thrombosis.<sup>39,40</sup> Conversely, moderate-severe (non-rheumatic) mitral regurgitation with AF may be protective against stroke especially in the setting of LA enlargement.<sup>41</sup> Thus, describing patients with mitral valve disease and AF who have the highest probability of stroke has proven difficult.

Aberrant blood stasis in the left atrium and LAA can be visualized on TOE with low-pulse wave Doppler velocities or SEC during episodes of AF.<sup>8,42–44</sup> In contrast, a quadriphasic pattern of blood flow is seen in sinus rhythm, signifying minimum blood stasis.<sup>45</sup> The presence of SEC is independently predictive of an increased risk of thromboembolism.<sup>46</sup> It occurs when there is an increased interaction between fibrinogen and erythrocytes, and their relative concentrations. Since more fibrinogen is needed to induce the same effect with lower number of haematocrits.<sup>47–49</sup> As some patients with AF are intravascularly deplete during a low-cardiac output state, this discovery could explain the increased stroke rates observed in this patient population.<sup>50</sup>

Crucially, SEC can still be detected in patients who have reverted to sinus rhythm from AF.<sup>51</sup> The prothrombotic state in AF also associates with the extent of LAA impairment as well as TOE indices of stroke risk.<sup>52,53</sup> For example, prothrombin fragment F1 + 2, thrombin-antithrombin III complex, and fibrinopeptide A correlate to SEC seen on TOE.<sup>54,55</sup>

## 4. Abnormal blood constituents

The third component of Virchow's triad refers to alterations in the blood constitutions, which are evident in AF (see Figure 2). The major promoters of thrombogenesis are the various intravascular proteins of the clotting cascade and platelets. Abnormal changes in these promoters and other constituents, such as growth factors, inflammatory cytokines, and extracellular matrix are present in patients with AF.

### 4.1 Abnormal changes in coagulation factors

Abnormal changes in clotting factors in AF are extensively described (see Table 2).

Excessive fibrin turnover has been described in patients with AF irrespective of onset.<sup>73,77,79,82,94–96</sup> Abnormal levels of hypercoagulable indices, such as thrombin-antithrombin complexes (a protein compound of thrombin and antithrombin) and prothrombin fragment F1 + 2 (activation peptide released from prothrombin during thrombin formation) are significant in patients with stroke who have AF compared to sinus rhythm.<sup>97</sup>

A relationship between various prothrombotic markers, stasis, and intracardiac thrombus is well described.<sup>70,98</sup>

#### 4.1.1 D-dimer

D-dimer, also known as a fibrin degradation product is a small protein fragment present in the circulation after a clot undergoes fibrinolysis. It is present in several disease states with systemic manifestations. Elevated levels of D-dimer are found in unwell patients with severe infection, trauma, or inflammatory disorders. D-dimer seems to play an important role in cardiovascular disease states such as AF. Several studies have shown that D-dimer on its own can predict the occurrence of LAA thrombi on TOE. This has led researchers to deduce that measuring D-dimer may help predict the absence of LAA thrombi.<sup>70,98</sup> For detection of the latter, Somloi *et al.*<sup>99</sup> have proposed that D-dimer measurements are comparable to utilization of a TOE-based strategy with a very good negative predictive value of 98%.

In chronic AF, D-dimer concentrations generally remain stable over time and thus appear to be a practical standard for evaluating the extent of hypercoagulability regardless of patients' age.<sup>94</sup> D-dimer along with clinical risk factors has also shown to predict ensuing thromboembolic events in AF patients, including those already on anticoagulation.<sup>86,92</sup>

**Table I** Echocardiographic features of LAA and risk of stroke<sup>6</sup>

| LAA parameters   | Author (ref)                            | Study                                                                                                                | Findings                                                                                                                                                                                                                                       |
|------------------|-----------------------------------------|----------------------------------------------------------------------------------------------------------------------|------------------------------------------------------------------------------------------------------------------------------------------------------------------------------------------------------------------------------------------------|
| LAA fibrosis     | Akoum and Marrouche <sup>15</sup>       | 178 AF patients                                                                                                      | Fibrosis of LAA directly correlated with reduced LAA flow velocities.                                                                                                                                                                          |
| LAA function     | Uretsky <i>et al.</i> <sup>16</sup>     | 141 patients (48 AF and 93 sinus rhythm)                                                                             | Mean LAA contraction velocity lower in patients with LAA thrombus, AF, or history of previous stroke/transient ischaemic attack (TIA). Thirty-three percent of patients with LAA flow velocity $\leq 11$ cm/s were found to have LAA thrombus. |
|                  | Lee <i>et al.</i> <sup>17</sup>         | 218 AF patients                                                                                                      | Lower LAA flow velocity in patients with stroke                                                                                                                                                                                                |
|                  | Goldman <i>et al.</i> <sup>18</sup>     | Post hoc analysis from the Stroke Prevention in AF III (SPAF-III) trial that included 721 patients who underwent TOE | Low LAA flow velocity independently linked with thrombus formation and risk of embolism.                                                                                                                                                       |
|                  | Lee <i>et al.</i> <sup>19</sup>         | 360 AF patients                                                                                                      | Incidence of ischaemic stroke increases in patients with reduced LAA flow velocity.                                                                                                                                                            |
|                  | Wai <i>et al.</i> <sup>20</sup>         | 103 consecutive patients who underwent TOE and TTE                                                                   | TTE LAA emptying velocity (LAA E) predicted the presence of thrombus or spontaneous echo contrast (SEC) independent of AF. Optimal TTE LAA E cut-off was $\leq 31$ cm/s in AF patients (80% sensitive, 79% specific).                          |
|                  | Sasaki <i>et al.</i> <sup>21</sup>      | TTE and TOE on 120 patients within 7 days of onset of acute ischaemic stroke                                         | LA peak systolic strain was significantly correlated with LAA emptying flow velocity and significantly decreased in patients with LAA dysfunction as defined by severe SEC and/or presence of thrombus.                                        |
|                  | Kumagai <i>et al.</i> <sup>22</sup>     | 98 consecutive patients who had stroke or TIA and then underwent TOE                                                 | LAA slow flow velocity was associated with the presence of thrombus.                                                                                                                                                                           |
|                  | Doukky <i>et al.</i> <sup>23</sup>      | 297 AF patients                                                                                                      | Patients with left atrial appendage thrombus (LAAT) had abnormal diastology.                                                                                                                                                                   |
|                  | Kimura <i>et al.</i> <sup>24</sup>      | 123 AF patients                                                                                                      | Patients with LAAT were found to have lower LAA blood flow velocity.                                                                                                                                                                           |
| LAA morphology   | Di Biase <i>et al.</i> <sup>25</sup>    | 932 AF patients                                                                                                      | Prevalence of ischaemic stroke varied among different LAA morphologies, such as cauliflower shape (18%), cactus (12%), windsock (10%), and chicken wing (4%) (see Figure 1).                                                                   |
|                  | Lee <i>et al.</i> <sup>19</sup>         | 360 AF patients                                                                                                      | Chicken wing shape was associated with reduced stroke risk.                                                                                                                                                                                    |
|                  | Kimura <i>et al.</i> <sup>26</sup>      | 80 AF patients                                                                                                       | Patients with cauliflower LAA morphology had high risk of stroke independent of anything else.                                                                                                                                                 |
|                  | Anselmino <i>et al.</i> <sup>27</sup>   | 348 AF patients undergoing elective ablation                                                                         | Correlation between cerebral infarcts on MRI and non-chicken wing morphology.                                                                                                                                                                  |
|                  | Khurram <i>et al.</i> <sup>28</sup>     | 1063 AF patients                                                                                                     | Widespread LAA trabeculations linked with ischaemic stroke.                                                                                                                                                                                    |
|                  | Yamamoto <i>et al.</i> <sup>29</sup>    | 564 AF patients undergoing ablation                                                                                  | Number of LAA lobes independently correlated with presence of LAA thrombus.                                                                                                                                                                    |
| LAA orifice area | Lee <i>et al.</i> <sup>17</sup>         | 218 AF patients                                                                                                      | Larger LAA orifice area in patients with stroke.                                                                                                                                                                                               |
|                  | Lee <i>et al.</i> <sup>19</sup>         | 360 AF patients                                                                                                      | Larger LAA orifice area associated with ischaemic stroke.                                                                                                                                                                                      |
|                  | SPAF Investigators <sup>30</sup>        | 568 AF patients                                                                                                      | LAA area $>6$ cm <sup>2</sup> associated with increased risk of arterial embolic events.                                                                                                                                                       |
|                  | Stollberger <i>et al.</i> <sup>31</sup> | 409 AF patients                                                                                                      | Increased LAA size was related with permanent AF. LAA size was not predictor for thromboembolic events.                                                                                                                                        |

Elevated D-dimer levels in patients on oral anticoagulation was also a predictor of cardiovascular adverse events.<sup>92</sup>

#### 4.1.2 Von Willebrand factor

von Willebrand factor (vWf) is a large multimeric (containing two or more polypeptide chains) glycoprotein present in plasma and engineered constitutively as ultra-large vWf in endothelium, subendothelial connective tissue, and megakaryocytes (precursor to platelets). It is a key player

in haemostasis. Measurement of plasma vWf levels have provided further insight into the hypercoagulable state in AF. vWf is a recognized marker of endothelial dysfunction, and increased vWf levels independently correlate with incidence of LAA thrombus in AF.<sup>70</sup> Additionally, elevated LAA endocardial expression of vWf is seen, particularly in patients with a bulky appendage; this appears to be related to the presence of adherent platelet thrombus.<sup>67</sup> Moreover, enhanced expression of vWf in the endocardial tissue is found to be related to dilated LA size in mitral valve pathology and wide myocyte diameter.<sup>78</sup>

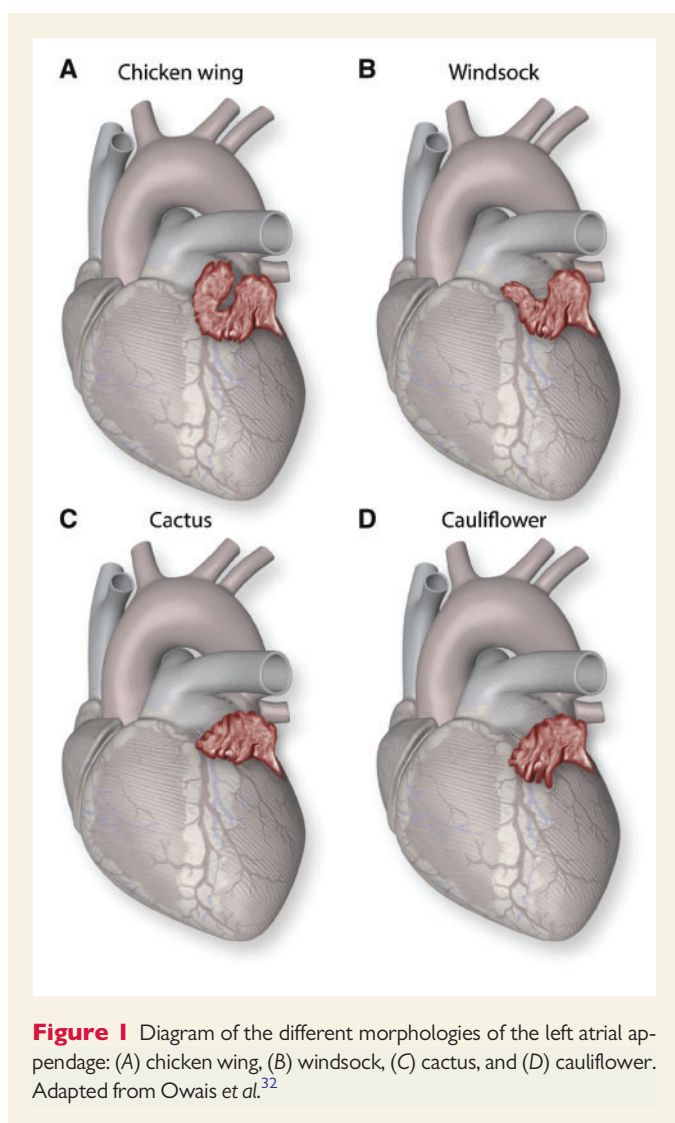

Tissue factor, a co-factor to factor VIIa and widely regarded as the physiological trigger to thrombin formation and vWf are overexpressed in the atrial endocardial tissue in patients with AF with a previous record of cardiogenic thromboembolism.<sup>84,100</sup> Interestingly, patients receiving either aspirin or no antithrombotic treatment have shown positive association with plasma vWf and D-dimer levels. However, this is not the case in patients receiving warfarin, thus confirming the capability of warfarin to alter the thrombogenic process.<sup>79</sup>

A positive association between AF and plasma vWf was also reported in the Rotterdam study.<sup>101</sup> This was most evident in females, and perhaps can explain the higher risk of stroke due to AF in females compared with males.<sup>102</sup> Plasma vWf levels were found to be elevated in patients with heart failure, previous stroke, diabetes, and those of older age. These are four independent risk factors for stroke and key components of the stroke risk stratification schema.<sup>62,63</sup> Moreover, further study of the data suggested that vWf concentrations may independently predict subsequent stroke and vascular events.<sup>63,103</sup> However, such clinical application will most likely be hampered by the poor specificity of vWf (and other similar biomarkers) since concentrations are also increased in multiple other disorders.<sup>104,105</sup>

### 4.1.3 Thrombin

Thrombin is usually seen as the end-product of the coagulation cascade and is thus responsible for the conversion of soluble fibrinogen into the insoluble fibrin clot. The coagulation pathway has several feedback loops and inhibitory circuits that are all directly or indirectly affected by thrombin concentration. Current techniques to evaluate haemostasis in clinical laboratories have their limitations, particularly in their sensitivity to detect hypercoagulable and mild hypocoagulable states.<sup>106</sup>

A different technique such as thrombin generation assay (TGA) may well be able to bridge this gap. Although present since 1950s, it has only recently become commercially available.<sup>107</sup> This evaluates thrombin generation (resulting from the action of procoagulant driver) and decay (as a result of the action of the anticoagulant driver) simultaneously and thus represent more accurately what happens *in vivo*.<sup>107</sup> Preliminary data suggests that TGA is affected by all anticoagulant drugs, and therefore, has the potential to be the prime assay to assess efficacy of these drugs, particularly in those individuals who bleed or have recurrent thrombosis despite being on a fixed dose of an anticoagulant.<sup>107</sup> TGA still lacks validation in clinical setting despite having several studies conducted.<sup>108–110</sup> Given the large inter-laboratory variability of this method, it is still far away for being utilized clinically. Standardization and validation of this method are essential for its introduction into the clinical practice.

## 4.2 Abnormal fibrinolysis

Enhanced fibrinolysis as evidenced by excess levels of tissue-plasminogen activator (t-PA) antigen, plasminogen activator inhibitor-1 (PAI-1), and low amounts of plasmin-antiplasmin (PAP) complex can be directly correlated to a pathophysiological response to the hypercoagulable state.<sup>75,111</sup> t-PA is an enzyme found on endothelial cells and is involved in the lysis of blood clots by catalysing the conversion of plasminogen to plasmin and thus plays an important role in fibrinolysis. Conversely, PAI-1 acts as an antagonist to t-PA, preventing fibrinolysis. Understandably, elevated levels of PAI-1 act as a risk factor for thrombosis leading to a prothrombotic state.

Plasmin is a key enzyme in fibrinolysis as it is responsible for degradation of several plasma proteins including fibrin clots (see Figure 3). Once converted from the inactivated plasminogen, plasmin binds to the clot and its cleavage produces angiostatin, an endogenous angiogenesis inhibitor (blocks the growth of new blood vessels), this probably causes inhibition of cell migration, proliferation, and induction of apoptosis within the clot. Thus, plasmin's deficiency can contribute to the hypercoagulable state *in vivo*. Conversely, alpha-2-antiplasmin ( $\alpha$ -2-plasmin) is an enzyme responsible for inactivating plasmin and in a normal physiological state prevents excessive bleeding.

PAP complex, a compound formed by reaction between plasmin and  $\alpha$ -2-plasmin is also an important index of recent fibrinolytic activity. Increased PAP complex formation is associated with enhanced fibrin formation and an increased reactive plasmaemia. Increased levels of plasmin-anti-plasmin complexes were found to be independently linked to thromboembolic risk factors, such as older age (>75 years), recent congestive heart failure, decreased fractional shortening of the left ventricle and recent onset of AF in the Stroke Prevention in Atrial Fibrillation (SPAF) III study.<sup>112</sup> There is also a strong relationship between t-PA concentrations and LA diameter in AF.<sup>95</sup> Anticoagulation leads to improvement in fibrinolytic markers in rheumatic AF.<sup>113</sup>

High concentrations of t-PA and PAI-1 can also signify the presence of confounder comorbidities, such as ischaemic heart disease, heart failure



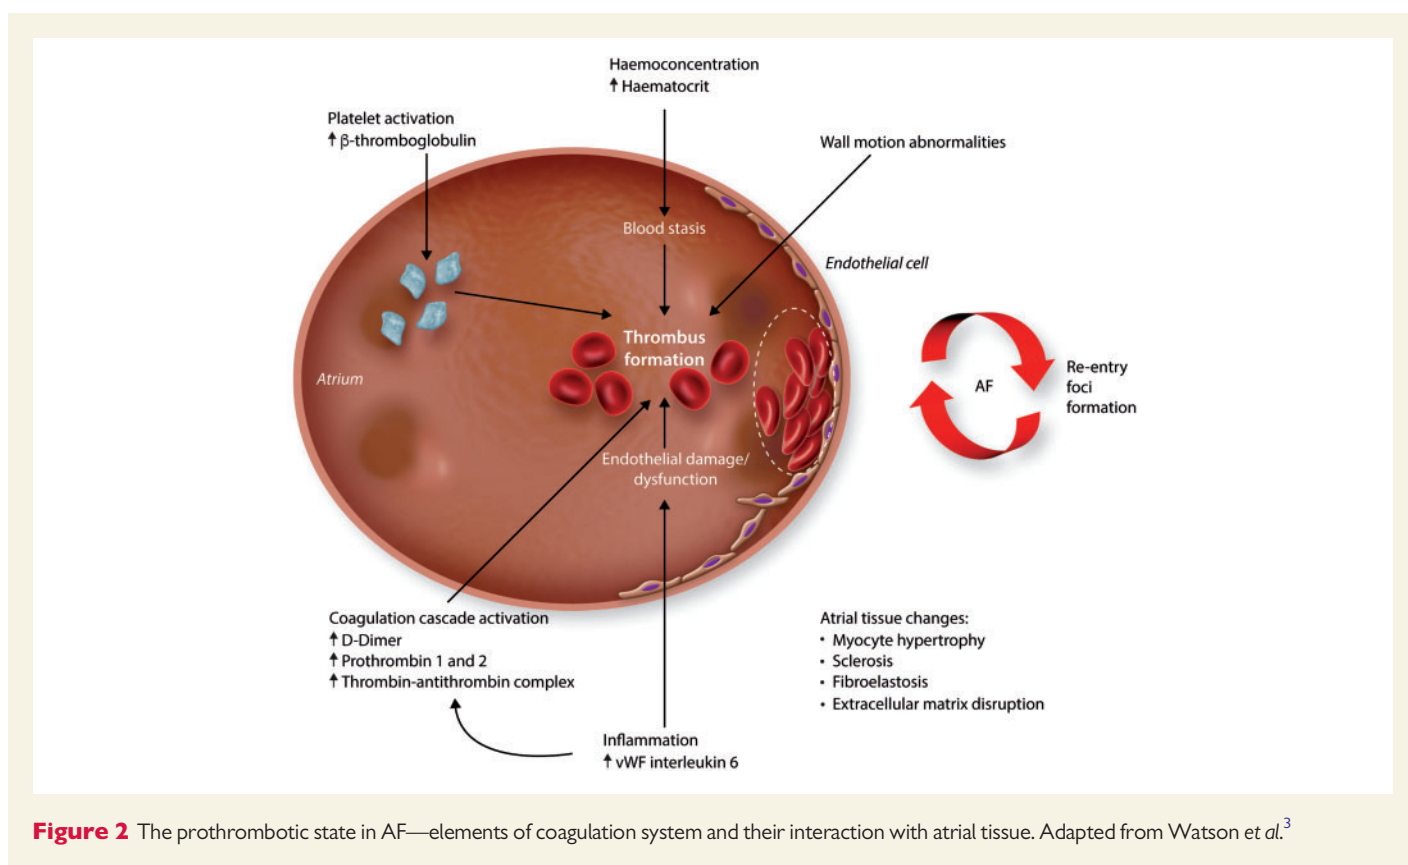

and hypertension, all of which can lead to endothelial dysfunction, damage, and inflammation. Nevertheless, the presence of AF *per se* independently modulates these biomarkers.<sup>95,111,113</sup> Consequently, high levels of t-PA and PAI-1 in AF could be as a result of endothelial damage or systemic inflammation.<sup>114,115</sup> PAI-1 concentrations are independent predictors of development of AF post-cardiopulmonary bypass as well as successful cardioversion.<sup>116,117</sup>

It is uncertain whether elevated levels of t-PA or PAI-1 in AF are as a result of endothelial damage, inflammation, fibrinolysis, vascular disease, or a combination. Conversely, abnormal changes in the fibrinolytic system might relate to thrombogenesis and structural remodelling of the atria, in view of the strong association to extracellular matrix turnover.<sup>3</sup>

### 4.3 Platelets

Numerous studies have shown a potential role for platelets in the prothrombotic state in AF but the results have been contradictory, indicative of the diverse aspects of platelet physiology that have been evaluated and possibly confounding from assay variability. Current evidence does support the concept that abnormal changes within platelets in AF do exist, but their correlation to increased thrombotic risk remains unclear. Such changes could simply indicate underlying vascular comorbidities.

Choudhury *et al.*<sup>118</sup> reported that patients with AF had increased levels of soluble P-selectin and platelet microparticles compared with healthy controls in sinus rhythm. However, no difference was observed compared with disease-matched controls, therefore, suggesting that these elevated levels are probably a consequence of the underlying

comorbidities rather than AF itself. Enhanced  $\beta$ -thromboglobulin, a platelet-specific protein that is released from  $\alpha$ -granules during platelet aggregation and subsequent thrombus formation and indicates platelet activation, has been found in patients with both valvular and non-valvular AF compared with controls in sinus rhythm.<sup>50,53,80,119–122</sup>

Anticoagulation therapy modulates only some of these abnormal platelet changes. For example, Kamath *et al.*<sup>74</sup> were unable to show a beneficial effect of anticoagulation on plasma  $\beta$ -thromboglobulin concentrations. Furthermore, *in vitro* measures of platelet aggregation were not significantly elevated in AF, thus probing the value of platelets in augmenting the prothrombogenic drive in this setting. Additionally, oral anticoagulation does not decrease platelet activation in AF, in spite of marked inhibition of other coagulation variables.<sup>123,124</sup> Conversely, aspirin reduces levels of soluble P-selectin when compared with warfarin in AF,<sup>125</sup> but some individuals given high-dose aspirin (325 mg per day) still did not demonstrate inclusive inhibition of platelet aggregation.<sup>126</sup>

While dual antiplatelet treatment is more effective in inhibiting platelet function than monotherapy alone, this approach does not considerably affect the markers of the coagulation cascade, such as antithrombin III, thrombin-antithrombin III complex, platelet-dependent thrombin generation, prothrombin fragment F1 + 2 in patients with AF.<sup>127</sup> This is consistent with clinical trials that have now shown that dual antiplatelet treatment with aspirin and clopidogrel was less efficacious than warfarin for stroke prevention in AF.<sup>128</sup> These clinical findings are also corroborated by data demonstrating that patients show alteration in plasma markers of platelet function but not platelet aggregation, which are impervious to anticoagulation.<sup>74</sup>

Sohara *et al.*<sup>129,130</sup> have suggested that improvement of platelet activity and coagulability occur within the first 12 h of developing AF and a

**Table 2** Examples of abnormal changes in coagulation in AF

| Author                                             | Study                                                                                                | Findings                                                                                                                                                                                                                                                                                                                             |
|----------------------------------------------------|------------------------------------------------------------------------------------------------------|--------------------------------------------------------------------------------------------------------------------------------------------------------------------------------------------------------------------------------------------------------------------------------------------------------------------------------------|
| Alonso <i>et al.</i> <sup>56</sup>                 | 1209 AF                                                                                              | ↑Fibrinogen (HR 1.13), ↑vWF (HR 1.17), and ↑factor VIIIc (HR 1.17); increased levels associated with poor outcomes.                                                                                                                                                                                                                  |
| Ancedy <i>et al.</i> <sup>57</sup>                 | 122 AF                                                                                               | ↑vWF                                                                                                                                                                                                                                                                                                                                 |
| Asakura <i>et al.</i> <sup>58</sup>                | 83 AF vs. healthy controls                                                                           | ↑TATIII and PF1 + 2                                                                                                                                                                                                                                                                                                                  |
| Christersson <i>et al.</i> <sup>59</sup>           | 18 201 AF                                                                                            | ↑D-dimer levels associated with increased incidence of stroke or systemic embolism, death, and major bleeding.                                                                                                                                                                                                                       |
| Chung <i>et al.</i> <sup>60</sup>                  | 25 AF vs. 35 coronary artery disease (CAD) vs. 30 healthy controls                                   | ↑Tissue factor (TF), ↑vascular endothelial growth factors (VEGF) in patients with AF, and CAD compared with controls.                                                                                                                                                                                                                |
| Conway <i>et al.</i> <sup>61</sup>                 | 37 AF                                                                                                | ↑CRP, soluble P-selectin, and haematocrit                                                                                                                                                                                                                                                                                            |
| Conway <i>et al.</i> <sup>62</sup>                 | 1321 AF                                                                                              | ↑vWF                                                                                                                                                                                                                                                                                                                                 |
| Conway <i>et al.</i> <sup>63</sup>                 | 994 AF                                                                                               | vWF is not a significant predictor of stroke and vascular events                                                                                                                                                                                                                                                                     |
| Feinberg <i>et al.</i> (SPAF III) <sup>64</sup>    | 1531 AF                                                                                              | PF1 + 2 not linked with thromboembolism                                                                                                                                                                                                                                                                                              |
| Freestone <i>et al.</i> <sup>65</sup>              | 59 AF; 40 healthy controls                                                                           | ↑vWF                                                                                                                                                                                                                                                                                                                                 |
| Fu <i>et al.</i> <sup>66</sup>                     | 90 AF                                                                                                | ↑soluble P-selectin; ↑fibrinogen                                                                                                                                                                                                                                                                                                     |
| Fukuchi <i>et al.</i> <sup>67</sup>                | AF vs. without AF                                                                                    | ↑vWF in atrial appendage tissue                                                                                                                                                                                                                                                                                                      |
| Gustafsson <i>et al.</i> <sup>68</sup>             | 20 AF with stroke; 20 AF without stroke; 20 stroke without AF; 40 healthy controls                   | ↑vWF and D dimer in patients with AF                                                                                                                                                                                                                                                                                                 |
| Hatzinikolaou-Kotsakou <i>et al.</i> <sup>69</sup> | 18 PAF; 17 persistent AF patients who underwent successful elective cardioversion; 20 permanent AF   | Permanent AF associated with ↑vWF, fibrinogen levels and soluble P-selectin ( $P < 0.001$ ). Persistent AF associated with ↑vWF ( $P = 0.0064$ ) and fibrinogen levels ( $P = 0.002$ ) but not P-selectin ( $P = 0.509$ ). PAF associated with ↑fibrinogen ( $P = 0.003$ ) and P-selectin ( $P = 0.005$ ) but not vWF ( $P = 0.61$ ) |
| Heppell <i>et al.</i> <sup>70</sup>                | 109 AF with or without thrombus in left atrium                                                       | ↑vWF, D-dimer, and TATIII in patients with LA thrombus                                                                                                                                                                                                                                                                               |
| Hu <i>et al.</i> <sup>71</sup>                     | 894 AF                                                                                               | ↑GDF-15                                                                                                                                                                                                                                                                                                                              |
| Inoue <i>et al.</i> <sup>72</sup>                  | 246 AF; 111 healthy controls                                                                         | ↑D-dimer in AF with risk factors but not significant in PF1 + 2                                                                                                                                                                                                                                                                      |
| Kahn <i>et al.</i> <sup>73</sup>                   | 75 AF vs. 42 controls                                                                                | vWF higher in AF after stroke                                                                                                                                                                                                                                                                                                        |
| Kamath <i>et al.</i> <sup>74</sup>                 | 93 AF; 50 healthy controls                                                                           | ↑D-dimer                                                                                                                                                                                                                                                                                                                             |
| Kamath <i>et al.</i> <sup>75</sup>                 | 31 acute onset AF; 93 permanent AF; 31 healthy controls                                              | Haematocrit raised in acute AF whereas ↑D-dimer in permanent AF but not in acute AF                                                                                                                                                                                                                                                  |
| Kanda <i>et al.</i> <sup>76</sup>                  | 34 AF vs. 14 controls                                                                                | ↑Fibrinopeptide A (FPA) in the AF group compared with control ( $P < 0.05$ )                                                                                                                                                                                                                                                         |
| Kumagai <i>et al.</i> <sup>77</sup>                | 73 AF; 73 controls                                                                                   | ↑D-dimer                                                                                                                                                                                                                                                                                                                             |
| Kumagai <i>et al.</i> <sup>78</sup>                | 16 AF post-mortem                                                                                    | ↑vWF, mRNA and protein in enlarged atriums                                                                                                                                                                                                                                                                                           |
| Lip <i>et al.</i> <sup>79</sup>                    | 87 AF; 158 controls                                                                                  | ↑vWF and D-dimer in AF patients                                                                                                                                                                                                                                                                                                      |
| Lip <i>et al.</i> <sup>80</sup>                    | 51 AF; 26 healthy controls                                                                           | ↑D-dimer                                                                                                                                                                                                                                                                                                                             |
| Lopez-Castaneda <i>et al.</i> <sup>81</sup>        | 107 AF                                                                                               | ↑vWF, ↑high-molecular-weight multimers; lower ADAMTS13                                                                                                                                                                                                                                                                               |
| Marin <i>et al.</i> <sup>82</sup>                  | 24 acute onset AF; 24 chronic AF vs. 24 coronary artery disease in sinus rhythm; 24 healthy controls | ↑vWF, D-dimer, and s-thrombomodulin in all AF groups with no significant difference post-cardioversion                                                                                                                                                                                                                               |
| Mondillo <i>et al.</i> <sup>83</sup>               | 45 AF; 35 healthy controls                                                                           | ↑vWF, D-dimer, and s-thrombomodulin                                                                                                                                                                                                                                                                                                  |
| Nakamura <i>et al.</i> <sup>84</sup>               | LAA tissue samples of seven AF vs. four without AF                                                   | ↑TF expression and vWF                                                                                                                                                                                                                                                                                                               |
| Nozawa <i>et al.</i> <sup>85</sup>                 | 509 AF; 111 healthy controls                                                                         | ↑D-dimer, non-significant in PF1 + 2                                                                                                                                                                                                                                                                                                 |
| Nozawa <i>et al.</i> <sup>86</sup>                 | 509 AF                                                                                               | ↑D-dimer but not PF1 + 2 with predictive significance for thromboembolic events                                                                                                                                                                                                                                                      |
| Ohara <i>et al.</i> <sup>87</sup>                  | 591 AF; 129 controls                                                                                 | ↑D-dimer, PF1 + 2, platelet factor 4, and $\beta$ -thromboglobulin in AF; D-dimer and prothrombin fragment F1 + 2 predict stroke risk                                                                                                                                                                                                |
| Roldan <i>et al.</i> <sup>88</sup>                 | 829 AF                                                                                               | vWF found to be an independent risk factor for unfavourable events.                                                                                                                                                                                                                                                                  |
| Sakurai <i>et al.</i> <sup>89</sup>                | 28 atrial flutter; 27 controls                                                                       | ↑D-dimer in patients with poor LAA function                                                                                                                                                                                                                                                                                          |
| Shinohara <i>et al.</i> <sup>53</sup>              | 45 AF                                                                                                | ↑TATIII and D dimer in patients with low-LAA velocity vs. patients with high-LAA velocity                                                                                                                                                                                                                                            |
| Siegbahn <i>et al.</i> <sup>90</sup>               | 6202 AF                                                                                              | ↑D-dimer; baseline D-dimer results were related to the rate of stroke/systemic embolism                                                                                                                                                                                                                                              |
| Sohara and Miyahara <sup>91</sup>                  | 13 paroxysmal AF vs. healthy controls                                                                | Non-significant in D-dimer and TATIII                                                                                                                                                                                                                                                                                                |

Continued

Table 2 Continued

| Author                    | Study                       | Findings                                                                                                                        |
|---------------------------|-----------------------------|---------------------------------------------------------------------------------------------------------------------------------|
| Vene et al. <sup>92</sup> | 113 AF                      | ↑D-dimer in AF with cardiovascular events vs. no events                                                                         |
| Wu et al. <sup>93</sup>   | 5412 AF vs. 29 292 controls | ↑Circulating haemostatic markers (PF-4, BTG, P-selectin, D-dimer, Fibrinogen, TAT, F1 + 2, AT-III, and vWf) in patients with AF |

ADAMTS13, a disintegrin and metalloproteinase with a thrombospondin type 1 motif, member 13; AT-III, antithrombin III; BTG, B-thromboglobulin; GDF, growth differentiation factor; LA, left atrium; LAA, left atrial appendage; mRNA, messenger RNA; PF1 + 2, prothrombin fragment F1 + 2; PF4, platelet factor 4; s-thrombomodulin, soluble thrombomodulin; TATIII, thrombin-antithrombin III complex; TF, tissue factor; vWF, von Willebrand factor.

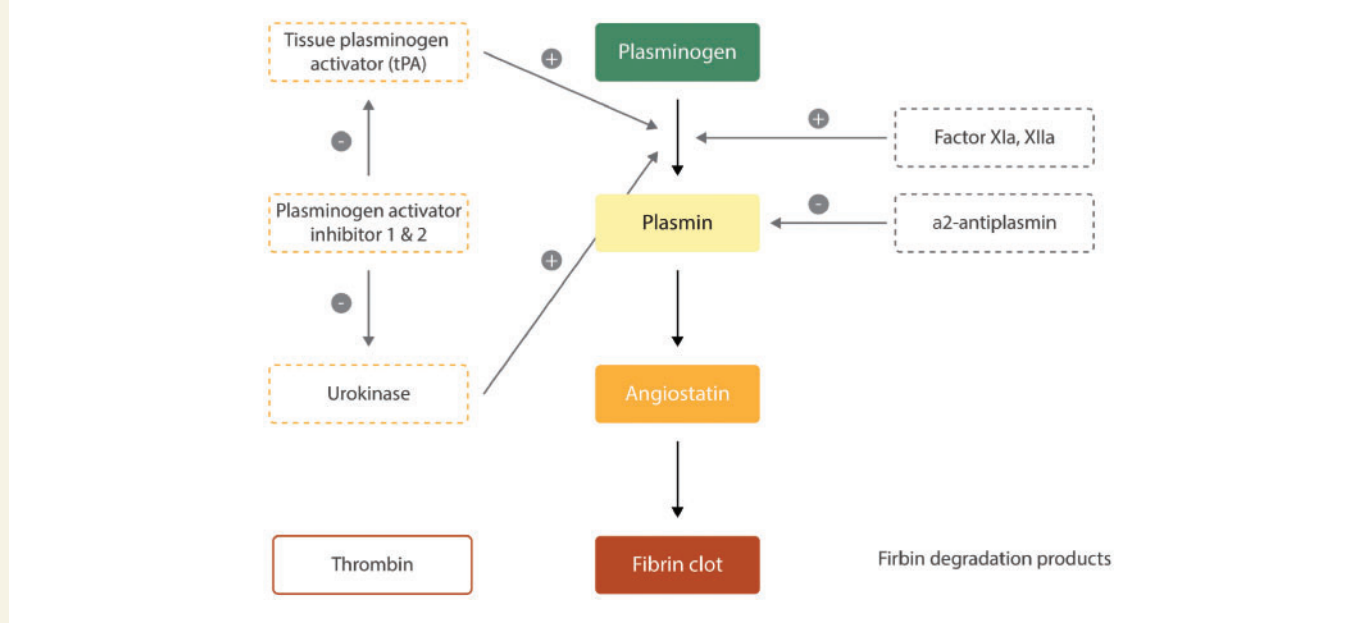

Figure 3 Schematic representation of fibrinolysis process including key components.

substantial reduction in platelet activity is seen after restoration of sinus rhythm compared with controls at 24 h post-cardioversion. This is consistent with the study by Akar et al.<sup>131</sup> showing that AF causes local cardiac platelet activation within minutes of onset.

Despite the presence of enhanced platelet activation in AF, there is inadequate data to prove that it directly augments thrombotic risk. A sub-study from SPAF-III trial showed no correlation between plasma β-thromboglobulin levels and later thromboembolic events.<sup>64</sup> On the contrary, the population-based Rotterdam study reported that plasma soluble P-selectin concentrations were extrapolative of unfavourable clinical outcomes in elderly patients with AF.<sup>132</sup>

In view of the strong association between platelet activation and the atherothrombotic vascular comorbidities related to AF, the platelet activation observed in AF could contribute to thrombogenesis indirectly. For example, high expression of P-selectin on platelets coupled with reduced concentrations of nitric oxide has also demonstrated to be a risk factor for silent cerebral infarction in patients with AF.<sup>133</sup> Additionally, elevated P-selectin and CD63 levels have both been linked with the pre-embolic and embolic status of patients with non-rheumatic AF.<sup>134</sup>

The excess thromboembolic risk in AF is more related to the activation of the coagulation cascade as oppose to platelets, since platelet

activation in AF is no more than what would be expected due to concurrent comorbidities.<sup>74,80,118</sup> Warfarin reduces greater number of plasma coagulation factor-related prothrombotic indices compared to platelet related indices.<sup>74,80</sup> This is consistent with data that warfarin (as a modulator of the coagulation cascade) is more efficacious than aspirin (a platelet inhibitor) as thromboprophylaxis in AF.

Anticoagulation therapy has demonstrated reduced concentrations of several prothrombotic markers.<sup>79,135,136</sup> This still applies with low-intensity anticoagulation (International Normalized Ratio (INR) 1.5–1.9), where D-dimer and prothrombin fragment F1+2 levels are suppressed.<sup>85</sup> Thus, in Phase II clinical trials of the non-vitamin K antagonist oral anticoagulants, markers of hypercoagulability have been utilized as surrogate indices of efficacy to assess the efficacy of antithrombotic treatments (e.g. AZD0837, Edoxaban, and Dabigatran).<sup>137–139</sup>

Recent developments in the understanding of haemostasis and thrombosis have identified new targets for development of new anticoagulants. Data from epidemiological studies and various animal models have provided an insight into the ‘contact pathway’ as a potential mediator of thrombosis that plays a negligible part in haemostasis.<sup>140</sup> Factor XI and XII have been recognized as potentially safer targets of anticoagulation than thrombin or FXa.<sup>140</sup> Further studies are clearly warranted to

explore this avenue and if successful could address the current unmet medical needs of safer anticoagulation with minimal risk of bleeding compared to existing anticoagulant agents.

### 4.3.1 Impact of restoration of sinus rhythm

Oltra et al.<sup>141</sup> showed that plasma levels of the markers of thrombin generation and activity were significantly increased acutely in patients with AF who had pharmacological cardioversion to sinus rhythm. Coagulation system is more prominently activated following electrical cardioversion as compared to a pharmacological strategy.<sup>142</sup> The same study found that the energy delivered for cardioversion and plasma D-dimer values on Day 7 were positively correlated.<sup>142</sup> Perhaps unsurprisingly, a prolonged duration of AF could lead to a well-established prothrombotic state (as estimated by D-dimer value) post-cardioversion.<sup>143</sup> This prothrombotic state following cardioversion has been noticed despite optimum anticoagulation.<sup>144</sup> Unsurprisingly, patients receiving therapeutic low-molecular weight heparin prior to cardioversion appear to have less hypercoagulability.<sup>145</sup> According to limited data, in atrial flutter, plasma amounts of prothrombin fragment F1 + 2, platelet factor 4, D-dimer, thrombin-antithrombin III complex, and  $\beta$ -thromboglobulin stay elevated but do not seem to increase further following cardioversion.<sup>89</sup>

## 5. What promotes the prothrombotic state in AF?

Multiple mechanisms have been reported to 'drive' the prothrombotic or hypercoagulable state in AF but most evidence has focused on the potential role of inflammation and various growth factors.

### 5.1 Inflammation

In AF, inflammation might not only lead to endothelial damage, dysfunction, or activation but can also be directly attributed to thrombogenesis *per se*. Growing data have proposed an association between inflammation and the instigation and maintenance of AF.<sup>146–150</sup> Additionally, abnormal inflammatory markers have shown collaboration with hypercoagulable indices in AF, suggesting a crucial role of inflammation in the prothrombotic state in AF.<sup>146</sup>

Majority of AF cases are associated with diverse comorbidities, many of which can augment the inflammatory state; however, there is potentially a direct association between AF and inflammation. Interleukin-6 concentrations are found to be abnormal in patients with AF, with implications on prognosis.<sup>151</sup> Levels of high-sensitivity C-reactive protein (hs-CRP) are higher in patients with AF than sinus rhythm controls, with a gradual increase in hs-CRP seen with the transition from sinus rhythm to paroxysmal and subsequently persistent AF.<sup>114</sup> Elevated levels of hs-CRP consistently associate with cardiovascular risk, while not necessarily with future AF.<sup>146</sup> Conversely, low levels of hs-CRP and E-selectin at baseline are linked with a higher probability of sinus rhythm maintenance at 6 months following electrical cardioversion of AF.<sup>152</sup> Nevertheless, sinus rhythm preservation does not appear to have an effect on hs-CRP levels, suggesting a relationship to underlying comorbidities.<sup>152</sup> High-hs-CRP concentrations demonstrated predictive mortality and vascular death in AF but not stroke itself.<sup>153</sup>

What is clear is that inflammation is intimately linked to thrombogenesis in patients with AF. CRP and interleukin-6, both markers of inflammation invigorate tissue factor production from monocytes *in vitro*.<sup>154,155</sup>

Interleukin-6 enhances platelet generation and sensitivity to thrombin, augments transcription of fibrinogen and is associated with both endothelial activation and damage.<sup>156,157</sup> Interleukin-6 is also independently associated with levels of tissue factor and increased stroke risk, while fibrinogen levels and plasma viscosity are independently linked to hs-CRP.<sup>158</sup>

### 5.2 Extracellular matrix turnover

The extracellular matrix is a dynamic structure and provides structural integrity for myocytes,<sup>159</sup> but continually undergoes a process of structural remodelling.<sup>160</sup> Impaired extracellular matrix degeneration in AF is well described, perhaps contributing to atrial remodelling, and therefore, indirectly leads to thrombogenesis.<sup>161–168</sup> More importantly, matrix metalloproteinases (MMPs) by virtue of several known interactions with the coagulation cascade such as plasmin could be directly implicated in thrombogenesis.<sup>169</sup> MMPs are calcium-dependent, zinc-containing enzymes belonging to a large family of enzymes known as metzincin superfamily. Collectively, they are responsible for degrading various types of extracellular matrix proteins.

The first matrix proteins considered were MMP-1 and Tissue inhibitor of metalloproteinase (TIMP)-1 in patients with AF not receiving anticoagulation by Marín et al.<sup>162</sup> Their work showed confirmation of defective matrix degradation in patients with AF. However, this finding was not independently related to the presence of AF on multivariate analysis.<sup>162</sup> Remarkably, an independent correlation was additionally seen between the MMP/TIMP system and the hypercoagulable state, as measured by prothrombin fragment F1 + 2.

Equally, improved MMP-2 and MMP-9 have been linked with low PAI-1 activity, providing further connection with thrombogenesis.<sup>170</sup> AF could also be allied with chamber-specific adaptations in myocardial collagen content along with MMP and TIMP amounts, suggestive of incongruous remodelling and modified collagen metabolism.<sup>167</sup>

### 5.3 Nitric oxide

Nitric oxide is synthesized by nitric oxide synthase which is available readily in the endothelium. Flow-mediated shear stress regulates the expression of nitric oxide synthase, and is therefore, down-regulated at sites with low flow velocity.<sup>171</sup> In arterial endothelium, nitric oxide has demonstrated strong antithrombotic effects, when released from activated platelets.<sup>172</sup> Nitric oxide restrains platelet deployment to the developing thrombus, while also impeding activity of PAI-1.<sup>173</sup>

Animal models of AF have displayed low nitric oxide bioavailability and an increase in PAI-1 expression due to diminished LA expression of nitric oxide synthase as a result of impaired atrial contraction and a subsequent decrease in shear stress.<sup>174</sup> Nitric oxide concentrations are also reduced in the LAA compared with control animals, providing further evidence to the notion that atrial thrombus is a common occurrence in the LAA.

### 5.4 Renin-angiotensin-aldosterone system

The Renin-angiotensin-aldosterone system (RAAS) is widely recognized as vital to the pathophysiology of various cardiovascular conditions, with the most important component being angiotensin II. The endothelium in atria has the capacity to produce and utilize this hormone due to acetylcholinesterase and angiotensin II receptors being present, both of which could be up-regulated in AF.<sup>175</sup> It is conceived that RAAS has a key role in instigation and perpetuation of AF along with providing support to other elements promoting the hypercoagulable state in AF.<sup>175–177</sup>



**Table 3** Different antithrombotic agents and their action on prothrombotic factors

| Class                                                | Agent        | Prothrombotic factor                      | Effect                                           |
|------------------------------------------------------|--------------|-------------------------------------------|--------------------------------------------------|
| Vitamin K antagonist                                 | Warfarin     | Factor II, VII, IX, X                     | Reduces levels <sup>186</sup>                    |
|                                                      |              | D-dimer                                   | Reduces levels <sup>79,80,85,96,139</sup>        |
|                                                      |              | Beta-thromboglobulin                      | Reduces levels <sup>80</sup>                     |
|                                                      |              | Prothrombin fragment F1 + 2               | Reduces levels <sup>85,136,187</sup>             |
|                                                      |              | Thrombin-antithrombin III complex (TAT)   | Reduces levels <sup>58,96</sup>                  |
|                                                      | Acenocumarol | Tissue-plasminogen activator (t-PA)       | Reduces levels <sup>96</sup>                     |
|                                                      |              | Tissue-plasminogen activator (t-PA)       | Reduces levels <sup>135</sup>                    |
|                                                      |              | Plasminogen activator inhibitor-1 (PAI-1) | Reduces levels <sup>135</sup>                    |
|                                                      |              | Antithrombin III                          | Reduces levels <sup>135</sup>                    |
|                                                      |              | D-dimer                                   | Reduces levels <sup>135</sup>                    |
| Non-vitamin K antagonist oral anticoagulants (NOACs) | Dabigatran   | Thrombin                                  | Reduces levels <sup>188</sup>                    |
|                                                      |              | D-dimer                                   | Reduces levels <sup>139</sup>                    |
|                                                      | Rivaroxaban  | Factor Xa                                 | Reduces levels <sup>189</sup>                    |
|                                                      | Apixaban     | Factor Xa                                 | Reduces levels <sup>190</sup>                    |
|                                                      | Edoxaban     | Factor Xa                                 | Reduces levels <sup>191</sup>                    |
|                                                      | AZD0837      | Thrombin                                  | Reduces levels <sup>137</sup>                    |
|                                                      |              | D-dimer                                   | Reduces levels <sup>137</sup>                    |
| Antiplatelets                                        | Aspirin      | Thromboxane A <sub>2</sub>                | Reduces platelets aggregation <sup>192,193</sup> |
|                                                      |              | Beta-thromboglobulin                      | No change <sup>80</sup>                          |
|                                                      |              | Platelet factor 4 (PF 4)                  | Reduces levels <sup>194</sup>                    |
|                                                      |              | Thrombin-antithrombin III complex (TAT)   | Reduces levels <sup>58</sup>                     |
|                                                      |              | Prothrombin fragment F1 + 2               | Reduces levels <sup>58</sup>                     |
|                                                      | Clopidogrel  | Platelets                                 | Reduces platelets aggregation <sup>195</sup>     |
|                                                      | Ticagrelor   | Platelets                                 | Reduces platelets aggregation <sup>196</sup>     |
|                                                      | Prasugrel    | Platelets                                 | Reduces platelets aggregation <sup>197</sup>     |

Angiotensin II has many pro-inflammatory properties and enhances the assembly of pro-inflammatory cytokines, such as interleukin-6 and tumour necrosis factor  $\alpha$ ; adhesion molecules e.g. vascular-cell adhesion molecule 1; monocyte chemo-attractant protein 1, and selectins, such as P-selectin.<sup>178–180</sup> Through the release of different chemokines, for example, cytokine-induced neutrophil recruitment, angiotensin II can initiate neutrophil recruitment.<sup>180</sup> The presence of angiotensin II receptors is strongly correlated with increased atrial cell death and leucocyte infiltration.<sup>181</sup> This suggests a complex relationship between RAAS, inflammation, and AF.

Furthermore, RAAS has been associated with the activation of thromboxane A<sub>2</sub>, a prothrombotic signalling molecule produced by activated platelets and various MMPs. This process happens as a direct effect of angiotensin II and induction of interleukin-6.<sup>182</sup> Additionally, angiotensin II can weaken endothelial dependent vasodilation by accelerating degradation of nitric oxide through generation of reactive oxygen species.<sup>183</sup> Similarly, PAI-1 synthesis is increased through activation of RAAS suggesting either pronounced endothelial damage or defective fibrinolysis in AF.<sup>184</sup>

Thus, it perhaps comes as no surprise then that modification of the RAAS cascade has beneficial clinical outcomes.<sup>176,177</sup> A substudy of the Losartan Intervention For Endpoint reduction in hypertension (LIFE) trial of patients with AF and LVH on an electrocardiogram (ECG) found that the incidence of stroke, cardiovascular morbidity, and mortality was significantly less in patients receiving losartan as compared to atenolol despite achieving similar reductions in blood pressure.<sup>185</sup>

## 6. Management implications

Several studies have looked at the current range of antithrombotic treatment available and their effects on the various prothrombotic factors related to AF (see Table 3).

Indices related to the prothrombotic or hypercoagulable state in AF have been used as biomarkers ('biological markers') to improve clinical risk stratification models for stroke/thromboembolism or bleeding, and/or assist in predicting the likelihood of success for cardioversion and preservation of sinus rhythm. Such biomarker research in AF has contributed to our current understanding of the pathophysiological mechanisms involved both in the development of arrhythmia, its underlying substrate and its long-term complications.

Many biomarkers in AF have provided independent information on increased risk of different outcomes (see Table 4). However, many biomarkers are predictive of multiple adverse outcomes in AF, and in many studies the incremental predictive value over clinical factor based risk scores is marginal, although statistically significant. Of note, biomarkers are related to several other important outcomes in patients with AF, such as risk of dementia, congestive heart failure, and myocardial infarction.<sup>198</sup> The other issue is the laboratory variability and diurnal variation in some biomarkers, as well as costs and practicality. Given that such biomarkers are indicative of many comorbidities (hence, a 'sick' heart) and are non-specific, these tests may be better utilized as 'rule out' rather than 'rule in' for management decision-making.

**Table 4** Schematic representation of the strength of association of different biomarkers and outcomes in patients with AF

| Biomarker               | Stroke/systemic embolism | Mortality | Major bleeding |
|-------------------------|--------------------------|-----------|----------------|
| Cardiac biomarkers      |                          |           |                |
| Troponin                | +++                      | +++       | +++            |
| NT-proBNP               | +++                      | +++       | +              |
| Renal dysfunction       | + / +++                  | ++        | ++             |
| Inflammation biomarkers |                          |           |                |
| CRP                     | +                        | +++       | +              |
| IL-6                    | ++                       | +++       | ++             |
| GDF-15                  | ++                       | +++       | +++            |
| Galectin-3              | +                        | +++       | +              |
| Endothelial function    |                          |           |                |
| vWF                     | +                        | ++        | ++             |
| Coagulation             |                          |           |                |
| D-dimer                 | ++                       | ++        | ++             |

Adapted from Hijazi et al.<sup>198</sup>  
+, outcomes in analysis unadjusted; ++, adjusted for clinical risk factors; +++, adjusted for clinical risk factors and other biomarkers.

Biomarkers were first proposed to refine clinical risk stratification in 2006, where high vWf levels are additive to the CHADS<sub>2</sub> and Birmingham (now CHA<sub>2</sub>DS<sub>2</sub>VASc) clinical scores to refine risk prediction.<sup>103</sup> In this study of 994 AF patients who were enrolled in the SPAF III trial, the CHADS<sub>2</sub> and Birmingham risk stratification schemes both predicted ischaemic stroke and vascular events but addition of high vWf levels to both clinical risk scores further refined risk stratification.<sup>103</sup>

Recently biomarker-based risk scores have been developed for improved risk prediction in AF such as the ABC [Age, Biomarkers (troponin and NT-proBNP), and Clinical history of stroke/TIA] stroke risk score. In recent sub-studies of anticoagulated clinical trial cohorts, the ABC score has outperformed the current validated CHA<sub>2</sub>DS<sub>2</sub>-VASc score for stroke risk prognostication with c-indices of 0.65–0.68 (ABC) vs. 0.60–0.62 (CHA<sub>2</sub>DS<sub>2</sub>-VASc);  $P \leq 0.004$ .<sup>199,200</sup> While statistically significant, all c-indexes were <0.7 indicating only modest predictive value. In real world cohorts, especially with long-term follow-up, the ABC score and the addition of other multiple biomarkers did not confer added predictive advantage over the CHA<sub>2</sub>DS<sub>2</sub>-VASc score.<sup>201,202</sup>

Similarly, a biomarker-based risk score for prediction of major bleeding in AF, the ABC-bleeding score including ABC of prior bleeding has been proposed, and shown to perform better than previously validated HAS-BLED and ORBIT scores.<sup>203</sup> Again, while statistically significant, all c-indexes were <0.7 indicating only modest predictive value. In real world cohorts, especially with long-term follow-up, the ABC-bleeding score did not confer added advantage over the HAS-BLED score.<sup>204</sup> GDF-15 is also non-specific and has been related to other adverse outcomes in cardiovascular disease<sup>205–207</sup> and the progression of glaucoma.<sup>208</sup>

**6.1 Where do we stand with biomarkers associated with prothrombotic state in AF?**

Biomarkers will always be additive and improve on the predictive value of clinical factor based risk scores, whether in AF or non-AF patients. The issue is whether measuring single or multiple biomarkers will

improve clinical management, balancing simplicity and practicality of decision-making in busy outpatient clinics or wards.

There are relatively limited data on the change in risk profile over time, and the relation to biomarker changes. Indeed, stroke and bleeding risks in AF patients are dynamic, and a change in risk factor profile is more predictive of outcomes than baseline risk assessment whether for stroke<sup>209,210</sup> or bleeding.<sup>211</sup> Thus far, most studies looking at biomarkers in AF have been based on single measurement at study entry, with outcomes determined many years later when the patient would be older and have acquired risk factors or had drug therapy changes. Repeated measurements may provide additional useful information such as determinants for increase of these biomarkers and subsequent risk in AF.

Indeed, sustained or incremental increases of troponin and NT-proBNP concentrations over time are associated with cardiovascular comorbidities and confer an even higher risk of stroke and mortality.<sup>212</sup> Results from The British Regional Heart Study, a prospective study of 3366 men followed up for a mean period of 13 years, showed that D-dimer and vWF were significantly and independently associated with NT-proBNP.<sup>213</sup> This implies that increased coagulation activity may be related to cardiac stress and consequent neurohormonal activation.<sup>213</sup> This has been supported by work showing that D-dimer levels can be elevated in AF patients with few clinical risk factors but high-BNP levels.<sup>214</sup> In AF patients, elevated NT-proBNP is associated with unfavourably altered prothrombotic fibrin clots and this phenotype is associated with prior ischaemic stroke.<sup>215</sup> Indeed, NT-proBNP levels can serve as a significant marker of LA thrombus in AF patients with acute ischaemic stroke or TIA.<sup>216</sup> Furthermore, Maruyama et al.<sup>217</sup> have shown that in patients with non-valvular AF and acute ischaemic stroke, apart from National Institute of Health Stroke Scale (NIHSS), BNP was a very useful predictor for long-term outcomes.

New biomarkers of the prothrombotic state have also been investigated. As one recent example illustrates, Rivera-Caravaca et al.<sup>218</sup> investigated the association and predictive performance of soluble fibrin monomer complex (SFMC) for stroke, adverse cardiovascular events, mortality in a cohort of patients with AF receiving vitamin K antagonist anticoagulant therapy. They showed that SFMC >12 µg/mL was not associated with stroke but was associated with higher risk of cardiovascular events and mortality. When this was combined with CHA<sub>2</sub>DS<sub>2</sub>-VASc score, there was (as expected) significant improvement in predictive performance with c-index of 0.661 (without) vs. 0.691 (with) ( $P < 0.001$ ) but decision curves demonstrated a similar net benefit and clinical usefulness. They concluded that the addition of SFMC to CHA<sub>2</sub>DS<sub>2</sub>-VASc score does improve its predictive ability for outcomes (at least statistically) but at the cost of less simplicity, practicality and clinical usefulness.

In summary, the utility of clinical risk scores would always be augmented by biomarkers that can include blood markers (e.g. vWf, D-dimer, troponin, natriuretic peptides), urine (e.g. eGFR, creatinine clearance or proteinuria), cardiac imaging (echocardiography, either transthoracic or transoesophageal), and/or cerebral imaging (e.g. computed tomography or magnetic resonance imaging) which can provide incremental predictive value for the identification of ‘high risk’ subjects.<sup>219</sup> Such a single- or multi-biomarker approach would probably be at the cost of less simplicity and practicality, limiting its (immediate) ‘quick’ use in everyday clinical practice. A possible role may well be in AF patients who are ‘borderline’ decisions for anticoagulation, for example those with CHA<sub>2</sub>DS<sub>2</sub>VASc 0–1 where biomarker assessment may help decision-making. Biomarkers along with other risk stratification scores are there to aid clinicians in their decision on anticoagulation and follow-up strategies.

## 7. Conclusion

The evidence shows that AF fulfils Virchow's triad for thrombogenesis with evidence of abnormal changes in flow, vessel wall (atrial structure) and blood constituents. The mechanisms underlying thrombogenesis in AF are complex and only remain partly understood. Assessment of the prothrombotic state in AF gives insight into its pathophysiology, and the pathogenesis of thrombosis in this common arrhythmia.

The prothrombotic state in AF has broader implications for its management. The advent of biomarkers has opened the field for some personalization of treatment for individual patients in AF, given the potential to identify better those at high risk of stroke from those at low risk and give anticoagulation appropriately.

**Conflict of interest:** A.A.K.: nothing to declare. G.Y.H.L.: consultant for Bayer/Janssen, BMS/Pfizer, Biotronik, Medtronic, Boehringer Ingelheim, Microlife and Daiichi-Sankyo; and a speaker for Bayer, BMS/Pfizer, Medtronic, Boehringer Ingelheim, Microlife, Roche and Daiichi-Sankyo; no personal fees received.

## References

- Lip G, Freedman B, De Caterina R, Potpara TS. Stroke prevention in atrial fibrillation: past, present and future. Comparing the guidelines and practical decision-making. *Thromb Haemost* 2017;**117**:1230–1239.
- Lip GY. Does atrial fibrillation confer a hypercoagulable state? *Lancet* 1995;**346**:1313–1314.
- Watson T, Shantsila E, Lip GY. Mechanisms of thrombogenesis in atrial fibrillation: Virchow's triad revisited. *Lancet* 2009;**373**:155–166.
- Choudhury A, Lip GY. Atrial fibrillation and the hypercoagulable state: from basic science to clinical practice. *Pathophysiol Haemost Thromb* 2003;**33**:282–289.
- Al-Saady NM, Obel OA, Camm AJ. Left atrial appendage: structure, function, and role in thromboembolism. *Heart* 1999;**82**:547–554.
- Yaghi S, Song C, Gray WA, Furie KL, Elkind MSV, Kamel H. Left atrial appendage function and stroke risk. *Stroke* 2015;**46**:3554–3559.
- Blackshear JL, Odell JA. Appendage obliteration to reduce stroke in cardiac surgical patients with atrial fibrillation. *Ann Thorac Surg* 1996;**61**:755–759.
- Pollick C, Taylor D. Assessment of left atrial appendage function by transesophageal echocardiography. Implications for the development of thrombus. *Circulation* 1991;**84**:223–231.
- Stoddard MF, Dawkins PR, Prince CR, Ammash NM. Left atrial appendage thrombus is not uncommon in patients with acute atrial fibrillation and a recent embolic event: a transesophageal echocardiographic study. *J Am Coll Cardiol* 1995;**25**:452–459.
- Akoum N, Fernandez G, Wilson B, McGann C, Kholmovski E, Marrouche N. Association of atrial fibrosis quantified using LGE-MRI with atrial appendage thrombus and spontaneous contrast on transesophageal echocardiography in patients with atrial fibrillation. *J Cardiovasc Electrophysiol* 2013;**24**:1104–1109.
- Goldsmith I, Kumar P, Carter P, Blann AD, Patel RL, Lip GY. Atrial endocardial changes in mitral valve disease: a scanning electron microscopy study. *Am Heart J* 2000;**140**:777–784.
- Masawa N, Yoshida Y, Yamada T, Joshita T, Ooneda G. Diagnosis of cardiac thrombosis in patients with atrial fibrillation in the absence of macroscopically visible thrombi. *Virchows Arch A Pathol Anat Histopathol* 1993;**422**:67–71.
- Frustaci A, Chimenti C, Bellocci F, Morgante E, Russo MA, Maseri A. Histological substrate of atrial biopsies in patients with lone atrial fibrillation. *Circulation* 1997;**96**:1180–1184.
- Boldt A, Wetzel U, Lauschke J, Weigl J, Gummert J, Hindricks G, Kottkamp H, Dhein S. Fibrosis in left atrial tissue of patients with atrial fibrillation with and without underlying mitral valve disease. *Heart* 2004;**90**:400–405.
- Akoum N, Marrouche N. Assessment and impact of cardiac fibrosis on atrial fibrillation. *Curr Cardiol Rep* 2014;**16**:518.
- Uretsky S, Shah A, Bangalore S, Rosenberg L, Sarji R, Canteles DR, Macmillan-Marotti D, Chaudhry FA, Sherrid MV. Assessment of left atrial appendage function with transthoracic tissue Doppler echocardiography. *Eur J Echocardiogr* 2009;**10**:363–371.
- Lee JM, Shim J, Uhm J-S, Kim YJ, Lee H-J, Pak H-N, Lee M-H, Joung B. Impact of increased orifice size and decreased flow velocity of left atrial appendage on stroke in nonvalvular atrial fibrillation. *Am J Cardiol* 2014;**113**:963–969.
- Goldman ME, Pearce LA, Hart RG, Zabalgoitia M, Asinger RW, Safford R, Halperin JL. Pathophysiologic correlates of thromboembolism in nonvalvular atrial fibrillation: I. Reduced flow velocity in the left atrial appendage (The Stroke Prevention in Atrial Fibrillation [SPAF-III] study). *J Am Soc Echocardiogr* 1999;**12**:1080–1087.
- Lee JM, Seo J, Uhm JS, Kim YJ, Lee HJ, Kim JY, Sung JH, Pak HN, Lee MH, Joung B. Why is left atrial appendage morphology related to strokes? An analysis of the flow velocity and orifice size of the left atrial appendage. *J Cardiovasc Electrophysiol* 2015;**26**:922–927.
- Wai SH, Kyu K, Galupo MJ, Songco GG, Kong WKF, Lee CH, Yeo TC, Poh KK. Assessment of left atrial appendage function by transthoracic pulsed Doppler echocardiography: comparing against transesophageal interrogation and predicting echocardiographic risk factors for stroke. *Echocardiography* 2017;**34**:1478–1485.
- Sasaki S, Watanabe T, Tamura H, Nishiyama S, Wanezaki M, Sato C, Yamaura G, Ishino M, Arimoto T, Takahashi H, Shishido T, Miyamoto T, Kubota I. Left atrial strain as evaluated by two-dimensional speckle tracking predicts left atrial appendage dysfunction in patients with acute ischemic stroke. *BBA Clin* 2014;**2**:40–47.
- Kumagai T, Matsuura Y, Yamamoto T, Ugawa Y, Fukushima T. Risk factors for left atrial thrombus from transesophageal echocardiography findings in ischemic stroke patients. *Fukushima J Med Sci* 2014;**60**:154–158.
- Doukky R, Garcia-Sayan E, Gage H, Nagarajan V, Demopoulos A, Cena M, Nazir NT, Karam GJ, Trohman RG, Kazlauskaitė R. The value of diastolic function parameters in the prediction of left atrial appendage thrombus in patients with nonvalvular atrial fibrillation. *Cardiovasc Ultrasound* 2014;**12**:10.
- Kimura M, Wasaki Y, Ogawa H, Nakatsuka M, Wakeyama T, Iwami T, Ono K, Nakao F, Matsuzaki M. Effect of low-intensity warfarin therapy on left atrial thrombus resolution in patients with nonvalvular atrial fibrillation: a transesophageal echocardiographic study. *Jpn Circ J* 2001;**65**:271.
- Di Biase L, Santangeli P, Anselmino M, Mohanty P, Salvetti I, Gili S, Horton R, Sanchez JE, Bai R, Mohanty S, Pump A, Cereceda Brantes M, Gallinghouse GJ, Burkhardt JD, Cesarani F, Scaglione M, Natale A, Gaita F. Does the left atrial appendage morphology correlate with the risk of stroke in patients with atrial fibrillation? Results from a multicenter study. *J Am Coll Cardiol* 2012;**60**:531–538.
- Kimura T, Takatsuki S, Inagawa K, Katsumata Y, Nishiyama T, Nishiyama N, Fukumoto K, Aizawa Y, Tanimoto Y, Tanimoto K, Jinzaki M, Fukuda K. Anatomical characteristics of the left atrial appendage in cardiogenic stroke with low CHADS<sub>2</sub> scores. *Heart Rhythm* 2013;**10**:921–925.
- Anselmino M, Scaglione M, Di Biase L, Gili S, Santangeli P, Corsinovi L, Pianelli M, Cesarani F, Faletti R, Righi D, Natale A, Gaita F. Left atrial appendage morphology and silent cerebral ischemia in patients with atrial fibrillation. *Heart Rhythm* 2014;**11**:2–7.
- Khurram IM, Dewire J, Mager M, Maqbool F, Zimmerman SL, Zipunnikov V, Beinart R, Marine JE, Spragg DD, Berger RD, Ashikaga H, Nazarian S, Calkins H. Relationship between left atrial appendage morphology and stroke in patients with atrial fibrillation. *Heart Rhythm* 2013;**10**:1843–1849.
- Yamamoto M, Seo Y, Kawamatsu N, Sato K, Sugano A, Machino-Ohtsuka T, Kawamura R, Nakajima H, Igarashi M, Sekiguchi Y, Ishizu T, Aonuma K. Complex left atrial appendage morphology and left atrial appendage thrombus formation in patients with atrial fibrillation. *Circ Cardiovasc Imaging* 2014;**7**:337–343.
- The Stroke Prevention in Atrial Fibrillation Investigators. Predictors of thromboembolism in atrial fibrillation: II. Echocardiographic features of patients at risk. The Stroke Prevention in Atrial Fibrillation Investigators. *Ann Intern Med* 1992;**116**:6–12.
- Stollberger C, Chnupa P, Kronik G, Bachl C, Brainin M, Schneider B, Slany J. [Embolism in left-atrial thrombi (ELAT Study): are spontaneous echo contrast, thrombi in the left atrium/appendage and size of the left atrial appendage predictors of possible embolisms?]. *Wien Med Wochenschr* 1997;**147**:46–51.
- Owais K, Mahmood F, Montealegre-Gallegos M, Khabbaz KR, Matyal R. Left atrial appendage, intraoperative echocardiography, and the anesthesiologist. *J Cardiothorac Vasc Anesth* 2015;**29**:1651–1662.
- Reddy VY, Sievert H, Halperin J, Doshi SK, Buchbinder M, Neuzil P, Huber K, Whisenant B, Kar S, Swarup V, Gordon N, Holmes D. Percutaneous left atrial appendage closure vs warfarin for atrial fibrillation: a randomized clinical trial. *JAMA* 2014;**312**:1988–1998.
- Holmes DR, Kar S, Price MJ, Whisenant B, Sievert H, Doshi SK, Huber K, Reddy VY. Prospective randomized evaluation of the Watchman Left Atrial Appendage Closure device in patients with atrial fibrillation versus long-term warfarin therapy: the PREVAIL trial. *J Am Coll Cardiol* 2014;**64**:1–12.
- Di Biase L, Burkhardt JD, Mohanty P, Sanchez J, Mohanty S, Horton R, Gallinghouse GJ, Bailey SM, Zagrodzky JD, Santangeli P, Hao S, Hongo R, Beheiry S, Themistoclakis S, Bonso A, Rossillo A, Corrado A, Ravielle A, Al-Ahmad A, Wang P, Cummings JE, Schweikert RA, Pelargonio G, Delo Russo A, Casella M, Santarelli P, Lewis WR, Natale A. Left atrial appendage: an underrecognized trigger site of atrial fibrillation. *Circulation* 2010;**122**:109–118.
- Doukky R, Gage H, Nagarajan V, Demopoulos A, Cena M, Garcia-Sayan E, Karam GJ, Kazlauskaitė R. B-type natriuretic peptide predicts left atrial appendage thrombus in patients with nonvalvular atrial fibrillation. *Echocardiography* 2013;**30**:889–895.
- Kurapati RBS. *Atrial Kick*. StatPearls: StatPearls Publishing; 2018.
- Sanfilippo AJ, Abascal VM, Sheehan M, Oertel LB, Harrigan P, Hughes RA, Weyman AE. Atrial enlargement as a consequence of atrial fibrillation. A prospective echocardiographic study. *Circulation* 1990;**82**:792–797.
- Di Tullio MR, Sacco RL, Sciacca RR, Homma S. Left atrial size and the risk of ischemic stroke in an ethnically mixed population. *Stroke* 1999;**30**:2019–2024.



40. Keren G, Etzion T, Sherez J, Zelcer AA, Megidish R, Miller HI, Laniado S. Atrial fibrillation and atrial enlargement in patients with mitral stenosis. *Am Heart J* 1987; **114**:1146–1155.
41. Nakagami H, Yamamoto K, Ikeda U, Mitsuhashi T, Goto T, Shimada K. Mitral regurgitation reduces the risk of stroke in patients with nonrheumatic atrial fibrillation. *Am Heart J* 1998; **136**:528–532.
42. Asinger RW, Koehler J, Pearce LA, Zabalgoitia M, Blackshear JL, Fenster PE, Strauss R, Hess D, Pennock GD, Rothbart RM, Halperin JL. Pathophysiologic correlates of thromboembolism in nonvalvular atrial fibrillation: II. Dense spontaneous echocardiographic contrast (The Stroke Prevention in Atrial Fibrillation [SPAF-III] study). *J Am Soc Echocardiogr* 1999; **12**:1088–1096.
43. Handke M, Harloff A, Hetzel A, Olschewski M, Bode C, Geibel A. Left atrial appendage flow velocity as a quantitative surrogate parameter for thromboembolic risk: determinants and relationship to spontaneous echocontrast and thrombus formation—a transesophageal echocardiographic study in 500 patients with cerebral ischemia. *J Am Soc Echocardiogr* 2005; **18**:1366–1372.
44. Obarshi TP, Salcedo EE, Castle LW, Stewart WJ. Spontaneous echo contrast in the left atrium during paroxysmal atrial fibrillation. *Am Heart J* 1990; **120**:988–990.
45. Jue J, Winslow T, Fazio G, Redberg RF, Foster E, Schiller NB. Pulsed Doppler characterization of left atrial appendage flow. *J Am Soc Echocardiogr* 1993; **6**:237–244.
46. Stollberger C, Chnupa P, Kronik G, Brainin M, Finsterer J, Schneider B, Slany J. Transesophageal echocardiographic correlates of thromboembolism in high-risk patients with nonvalvular atrial fibrillation. The Stroke Prevention in Atrial Fibrillation Investigators Committee on Echocardiography. *Ann Intern Med* 1998; **128**:639–647.
47. Black IW, Chesterman CN, Hopkins AP, Lee LC, Chong BH, Walsh WF. Hematologic correlates of left atrial spontaneous echo contrast and thromboembolism in nonvalvular atrial fibrillation. *J Am Coll Cardiol* 1993; **21**:451–457.
48. Merino A, Hauptman P, Badimon L, Badimon JJ, Cohen M, Fuster V, Goldman M. Echocardiographic “smoke” is produced by an interaction of erythrocytes and plasma proteins modulated by shear forces. *J Am Coll Cardiol* 1992; **20**:1661–1668.
49. Rastegar R, Harnick DJ, Weidemann P, Fuster V, Collier B, Badimon JJ, Chesebro J, Goldman ME. Spontaneous echo contrast videodensity is flow-related and is dependent on the relative concentrations of fibrinogen and red blood cells. *J Am Coll Cardiol* 2003; **41**:603–610.
50. Kamath S, Chin BS, Blann AD, Lip GY. A study of platelet activation in paroxysmal, persistent and permanent atrial fibrillation. *Blood Coagul Fibrinolysis* 2002; **13**:627–636.
51. Wang Y-C, Lin J-L, Hwang J-J, Lin M-S, Tseng C-D, Huang SKS, Lai L-P. Left atrial dysfunction in patients with atrial fibrillation after successful rhythm control for > 3 months. *Chest* 2005; **128**:2551–2556.
52. Igarashi Y, Kashimura K, Makiyama Y, Sato T, Ojima K, Aizawa Y. Left atrial appendage dysfunction in chronic nonvalvular atrial fibrillation is significantly associated with an elevated level of brain natriuretic peptide and a prothrombotic state. *Jpn Circ J* 2001; **65**:788–792.
53. Shinohara H, Fukuda N, Soeki T, Takeichi N, Yui Y, Tamura Y, Oki T. Relationship between flow dynamics in the left atrium and hemostatic abnormalities in patients with nonvalvular atrial fibrillation. *Jpn Heart J* 1998; **39**:721–730.
54. Tsai LM, Chen JH, Tsao CJ. Relation of left atrial spontaneous echo contrast with prothrombotic state in atrial fibrillation associated with systemic hypertension, idiopathic dilated cardiomyopathy, or no identifiable cause (lone). *Am J Cardiol* 1998; **81**:1249–1252.
55. Sakurai K, Hirai T, Nakagawa K, Kameyama T, Nozawa T, Asanoi H, Inoue H. Left atrial appendage function and abnormal hypercoagulability in patients with atrial flutter. *Chest* 2003; **124**:1670–1674.
56. Alonso A, Tang W, Agarwal SK, Soliman EZ, Chamberlain AM, Folsom AR. Hemostatic markers are associated with the risk and prognosis of atrial fibrillation: the ARIC study. *Int J Cardiol* 2012; **155**:217–222.
57. Ancey Y, Berthelot E, Lang S, Ederhy S, Boyer-Chatenet L, Di Angelantonio E, Soulat-Dufour L, Etienne A, Adevane-Scheublé S, Boccara F, Cohen A. Is von Willebrand factor associated with stroke and death at mid-term in patients with non-valvular atrial fibrillation? *Arch Cardiovasc Dis* 2018; **111**:357–369.
58. Asakura H, Hifumi S, Jokaji H, Saito M, Kumabashiri I, Uotani C, Morishita E, Yamazaki M, Shibata K, Mizuhashi K, Mifune J, Matsuda T. Prothrombin fragment F1 + 2 and thrombin-antithrombin III complex are useful markers of the hypercoagulable state in atrial fibrillation. *Blood Coagul Fibrinolysis* 1992; **3**:469–473.
59. Christensson C, Wallentin L, Andersson U, Alexander JH, Ansell J, De Caterina R, Gersh BJ, Granger CB, Hanna M, Horowitz JD, Huber K, Husted S, Hylek EM, Lopes RD, Siegbahn A. D-dimer and risk of thromboembolic and bleeding events in patients with atrial fibrillation—observations from the ARISTOTLE trial. *J Thromb Haemost* 2014; **12**:1401–1412.
60. Chung NA, Belgore F, Li-Saw-Hee FL, Conway DS, Blann AD, Lip GY. Is the hypercoagulable state in atrial fibrillation mediated by vascular endothelial growth factor? *Stroke* 2002; **33**:2187–2191.
61. Conway DS, Buggins P, Hughes E, Lip GY. Relation of interleukin-6, C-reactive protein, and the prothrombotic state to transesophageal echocardiographic findings in atrial fibrillation. *Am J Cardiol* 2004; **93**:1368–73, A6.
62. Conway DS, Pearce LA, Chin BS, Hart RG, Lip GY. Plasma von Willebrand factor and soluble p-selectin as indices of endothelial damage and platelet activation in 1321 patients with nonvalvular atrial fibrillation: relationship to stroke risk factors. *Circulation* 2002; **106**:1962–1967.
63. Conway DS, Pearce LA, Chin BS, Hart RG, Lip GY. Prognostic value of plasma von Willebrand factor and soluble P-selectin as indices of endothelial damage and platelet activation in 994 patients with nonvalvular atrial fibrillation. *Circulation* 2003; **107**:3141–3145.
64. Feinberg WM, Pearce LA, Hart RG, Cushman M, Cornell ES, Lip GYH, Bovill EG. Markers of thrombin and platelet activity in patients with atrial fibrillation: correlation with stroke among 1531 participants in the stroke prevention in atrial fibrillation III study. *Stroke* 1999; **30**:2547–2553.
65. Freestone B, Chong AY, Lim HS, Blann A, Lip GY. Angiogenic factors in atrial fibrillation: a possible role in thrombogenesis? *Ann Med* 2005; **37**:365–372.
66. Fu R, Wu S, Wu P, Qiu J. A study of blood soluble P-selectin, fibrinogen, and von Willebrand factor levels in idiopathic and lone atrial fibrillation. *Europace* 2011; **13**:31–36.
67. Fukuchi M, Watanabe J, Kumagai K, Katori Y, Baba S, Fukuda K, Yagi T, Iguchi A, Yokoyama H, Miura M, Kagaya Y, Sato S, Tabayashi K, Shirato K. Increased von Willebrand factor in the endocardium as a local predisposing factor for thrombogenesis in overloaded human atrial appendage. *J Am Coll Cardiol* 2001; **37**:1436–1442.
68. Gustafsson C, Blomback M, Britton M, Hamsten A, Svensson J. Coagulation factors and the increased risk of stroke in nonvalvular atrial fibrillation. *Stroke* 1990; **21**:47–51.
69. Hatzinikolaou-Kotsakou E, Kartas Z, Tziakas D, Hotidis A, Stakos D, Tsatalas K, Bourikas G, Kotsakou ME, Hatseras DI. Atrial fibrillation and hypercoagulability: dependent on clinical factors or/and on genetic alterations? *J Thromb Thrombolysis* 2003; **16**:155–161.
70. Heppell RM, Berkin KE, McLennan JM, Davies JA. Haemostatic and haemodynamic abnormalities associated with left atrial thrombosis in non-rheumatic atrial fibrillation. *Heart* 1997; **77**:407–411.
71. Hu XF, Zhan R, Xu S, Wang J, Wu J, Liu X, Li Y, Chen L. Growth differentiation factor 15 is associated with left atrial/left atrial appendage thrombus in patients with nonvalvular atrial fibrillation. *Clin Cardiol* 2018; **41**:34–38.
72. Inoue H, Nozawa T, Okumura K, Jong-Dae L, Shimizu A, Yano K. Prothrombotic activity is increased in patients with nonvalvular atrial fibrillation and risk factors for embolism. *Chest* 2004; **126**:687–692.
73. Kahn SR, Solymoss S, Flegel KM. Nonvalvular atrial fibrillation: evidence for a prothrombotic state. *CMAJ* 1997; **157**:673–681.
74. Kamath S, Blann AD, Chin BSP, Lanza F, Aleil B, Cazenave JP, Lip GYH. A study of platelet activation in atrial fibrillation and the effects of antithrombotic therapy. *Eur Heart J* 2002; **23**:1788–1795.
75. Kamath S, Blann AD, Chin BSP, Lip GYH. Platelet activation, haemorheology and thrombogenesis in acute atrial fibrillation: a comparison with permanent atrial fibrillation. *Heart* 2003; **89**:1093–1095.
76. Kanda A, Hamamoto M, Nagao T, Ichiseki H, Miyazaki T, Kaku T, Terashi A. [Alterations of hemostatic markers in elderly patient with atrial fibrillation without a history of stroke]. *Nihon Ronen Igakkai Zasshi* 1993; **30**:382–386.
77. Kumagai K, Fukunami M, Ohmori M, Kitabatake A, Kamada T, Hoki N. Increased intracardiovascular clotting in patients with chronic atrial fibrillation. *J Am Coll Cardiol* 1990; **16**:377–380.
78. Kumagai K, Fukuchi M, Ohta J, Baba S, Oda K, Akimoto H, Kagaya Y, Watanabe J, Tabayashi K, Shirato K. Expression of the von Willebrand factor in atrial endocardium is increased in atrial fibrillation depending on the extent of structural remodeling. *Circ J* 2004; **68**:321–327.
79. Lip GY, Lowe GD, Rumley A, Dunn FG. Increased markers of thrombogenesis in chronic atrial fibrillation: effects of warfarin treatment. *Br Heart J* 1995; **73**:527–533.
80. Lip GY, Lip PL, Zarifis J, Watson RD, Bareford D, Lowe GD, Beevers DG. Fibrin D-dimer and beta-thromboglobulin as markers of thrombogenesis and platelet activation in atrial fibrillation. Effects of introducing ultra-low-dose warfarin and aspirin. *Circulation* 1996; **94**:425–431.
81. Lopez-Castaneda S, Valencia-Hernández I, Areal C, Godínez-Hernández D, Viveros-Sandoval ME. Von Willebrand factor: multimeric structure and functional activity in patients with atrial fibrillation with and without oral anticoagulation. *Clin Appl Thromb Hemost* 2018; **24**:647–654.
82. Marín F, Roldán V, Climent VE, Ibáñez A, García A, Marco P, Sogorb F, Lip GYH. Plasma von Willebrand factor, soluble thrombomodulin, and fibrin D-dimer concentrations in acute onset non-rheumatic atrial fibrillation. *Heart* 2004; **90**:1162–1166.
83. Mondillo S, Sabatini L, Agricola E, Ammatturo T, Guerrini F, Barbati R, Pastore M, Fineschi D, Nami R. Correlation between left atrial size, prothrombotic state and markers of endothelial dysfunction in patients with lone chronic nonrheumatic atrial fibrillation. *Int J Cardiol* 2000; **75**:227–232.
84. Nakamura Y, Nakamura K, Fukushima-Kusano K, Ohta K, Matsubara H, Hamuro T, Yutani C, Ohe T. Tissue factor expression in atrial endothelia associated with nonvalvular atrial fibrillation: possible involvement in intracardiac thrombogenesis. *Thromb Res* 2003; **111**:137–142.
85. Nozawa T, Inoue H, Iwasa A, Okumura K, Jong-Dae L, Shimizu A, Hayano M, Yano K. Effects of anticoagulation intensity on hemostatic markers in patients with nonvalvular atrial fibrillation. *Circ J* 2004; **68**:29–34.



86. Nozawa T, Inoue H, Hirai T, Iwasa A, Okumura K, Lee J-D, Shimizu A, Hayano M, Yano K. D-dimer level influences thromboembolic events in patients with atrial fibrillation. *Int J Cardiol* 2006;**109**:59–65.
87. Ohara K, Inoue H, Nozawa T, Hirai T, Iwasa A, Okumura K, Lee J-D, Shimizu A, Hayano M, Yano K. Accumulation of risk factors enhances the prothrombotic state in atrial fibrillation. *Int J Cardiol* 2008;**126**:316–321.
88. Roldan V, Marin F, Muina B. Plasma von Willebrand factor levels are an independent risk factor for adverse events including mortality and major bleeding in anticoagulated atrial fibrillation patients. *J Am Coll Cardiol* 2011;**57**:2496–2504.
89. Sakurai K, Hirai T, Nakagawa K, Kameyama T, Nozawa T, Asanoi H, Inoue H. Prolonged activation of hemostatic markers following conversion of atrial flutter to sinus rhythm. *Circ J* 2004;**68**:1041–1044.
90. Siegbahn A, Oldgren J, Andersson U, Ezekowitz MD, Reilly PA, Connolly SJ, Yusuf S, Wallentin L, Eikelboom JW. D-dimer and factor VIIa in atrial fibrillation - prognostic values for cardiovascular events and effects of anticoagulation therapy. A RE-LY substudy. *Thromb Haemost* 2016;**115**:921–930.
91. Sahara H, Miyahara K. Effect of atrial fibrillation on the fibrino-coagulation system—study in patients with paroxysmal atrial fibrillation. *Jpn Circ J* 1994;**58**:821–826.
92. Vene N, Mavri A, Kosmely K, Stegnar M. High D-dimer levels predict cardiovascular events in patients with chronic atrial fibrillation during oral anticoagulant therapy. *Thromb Haemost* 2003;**90**:1163–1172.
93. Wu N, Tong S, Xiang Y, Wu L, Xu B, Zhang Y, Ma X, Li Y, Song Z, Zhong L. Association of hemostatic markers with atrial fibrillation: a meta-analysis and meta-regression. *PLoS One* 2015;**10**:e0124716.
94. Mahé I, Drouet L, Chassany O, Mazoyer E, Simoneau G, Knellwolf AL, Caulin C, Bergmann JF. D-dimer: a characteristic of the coagulation state of each patient with chronic atrial fibrillation. *Thromb Res* 2002;**107**:1–6.
95. Roldan V, Marin F, Marco P, Martinez JG, Calatayud R, Sogorb F. Hypofibrinolysis in atrial fibrillation. *Am Heart J* 1998;**136**:956–960.
96. Mitusch R, Siemens HJ, Garbe M, Wagner T, Sheikhzadeh A, Diederich KW. Detection of a hypercoagulable state in nonvalvular atrial fibrillation and the effect of anticoagulant therapy. *Thromb Haemost* 1996;**75**:219–223.
97. Turgut N, Akdemir O, Turgut B, Demir M, Ekuklu G, Vural Ö, Özbay G, Utku U. Hypercoagulopathy in stroke patients with nonvalvular atrial fibrillation: hematologic and cardiologic investigations. *Clin Appl Thromb Hemost* 2006;**12**:15–20.
98. Habara S, Dote K, Kato M, Sasaki S, Goto K, Takemoto H, Hasegawa D, Matsuda O. Prediction of left atrial appendage thrombi in non-valvular atrial fibrillation. *Eur Heart J* 2007;**28**:2217–2222.
99. Somloi M, Tomcsanyi J, Nagy E, Bodo I, Bezzegh A. D-dimer determination as a screening tool to exclude atrial thrombi in atrial fibrillation. *Am J Cardiol* 2003;**92**:85–87.
100. Morrissey JH. Tissue factor: an enzyme cofactor and a true receptor. *Thromb Haemost* 2001;**86**:66–74.
101. Conway DSG, Heeringa J, Van Der Kuip DAM, Chin BSP, Hofman A, Witteman JCM, Lip GYH. Atrial fibrillation and the prothrombotic state in the elderly: the Rotterdam Study. *Stroke* 2003;**34**:413–417.
102. Nielsen PB, Skjøth F, Overvad TF, Larsen TB, Lip GYH. Female sex is a risk modifier rather than a risk factor for stroke in atrial fibrillation: should we use a CHA<sub>2</sub>DS<sub>2</sub>-VA score rather than CHA<sub>2</sub>DS<sub>2</sub>-VASc? *Circulation* 2018;**137**:832–840.
103. Lip GY, Lane D, Van Walraven C, Hart RG. Additive role of plasma von Willebrand factor levels to clinical factors for risk stratification of patients with atrial fibrillation. *Stroke* 2006;**37**:2294–2300.
104. Varughese GI, Patel JV, Tomson J, Lip GY. Effects of blood pressure on the prothrombotic risk in 1235 patients with non-valvular atrial fibrillation. *Heart* 2007;**93**:495–499.
105. Lip GY, Pearce LA, Chin BS, Conway DS, Hart RG. Effects of congestive heart failure on plasma von Willebrand factor and soluble P-selectin concentrations in patients with non-valvular atrial fibrillation. *Heart* 2005;**91**:759–763.
106. Duarte RCF, Ferreira CN, Rios DRA, Reis HJD, Carvalho MDG. Thrombin generation assays for global evaluation of the hemostatic system: perspectives and limitations. *Rev Bras Hematol Hemoter* 2017;**39**:259–265.
107. Tripodi A. Thrombin generation assay and its application in the clinical laboratory. *Clin Chem* 2016;**62**:699–707.
108. Spronk HMJ, Dielis AWJH, De Smedt E, van Oerle R, Fens D, Prins MH, Hamulyák K, ten Cate H. Assessment of thrombin generation II: validation of the calibrated automated thrombogram in platelet-poor plasma in a clinical laboratory. *Thromb Haemost* 2008;**100**:362–364.
109. Dargaud Y, Luddington R, Gray E, Lecompte T, Siegemund T, Baglin T, Hogwood J, Regnault V, Siegemund A, Negrier C. Standardisation of thrombin generation test— which reference plasma for TGT? An international multicentre study. *Thromb Res* 2010;**125**:353–356.
110. Perrin J, Depasse F, Lecompte T. Large external quality assessment survey on thrombin generation with CAT: further evidence for the usefulness of normalisation with an external reference plasma. *Thromb Res* 2015;**136**:125–130.
111. Furui H, Taniguchi N, Yamauchi K, Sotobata I, Saito H, Inagaki H. Effects of treadmill exercise on platelet function, blood coagulability and fibrinolytic activity in patients with atrial fibrillation. *Jpn Heart J* 1987;**28**:177–184.
112. Feinberg WM, Macy E, Cornell ES, Nightingale SD, Pearce LA, Tracy RP, Bovill EG. Plasmin-alpha2-antiplasmin complex in patients with atrial fibrillation. Stroke Prevention in Atrial Fibrillation Investigators. *Thromb Haemost* 1999;**82**:100–103.
113. Marín Ortuño F, Roldán Schilling V, Marco Vera P, Martínez Martínez JG, Toral Noguera A, García de Burgos Rico F, Calatayud Sendra R, Sogorb Garri F. [Improvement in fibrinolytic function following anticoagulant treatment in chronic rheumatic atrial fibrillation]. *Rev Esp Cardiol* 1999;**52**:25–30.
114. Chung MK, Martin DO, Sprecher D, Wazni O, Kanderian A, Carnes CA, Bauer JA, Tchou PJ, Niebauer MJ, Natale A, Van Wagoner DR. C-reactive protein elevation in patients with atrial arrhythmias: inflammatory mechanisms and persistence of atrial fibrillation. *Circulation* 2001;**104**:2886–2891.
115. Dernellis J, Panaretou M. C-reactive protein and paroxysmal atrial fibrillation: evidence of the implication of an inflammatory process in paroxysmal atrial fibrillation. *Acta Cardiol* 2001;**56**:375–380.
116. Tveit A, Seljeløt I, Grundvold I, Abdelnoor M, Smith P, Arnesen H. Levels of PAI-1 and outcome after electrical cardioversion for atrial fibrillation. *Thromb Res* 2008;**121**:447–453.
117. Pretorius M, Donahue BS, Yu C, Greulich JP, Roden DM, Brown NJ. Plasminogen activator inhibitor-1 as a predictor of postoperative atrial fibrillation after cardiopulmonary bypass. *Circulation* 2007;**116**:11–17.
118. Choudhury A, Chung I, Blann AD, Lip GY. Elevated platelet microparticle levels in nonvalvular atrial fibrillation: relationship to p-selectin and antithrombotic therapy. *Chest* 2007;**131**:809–815.
119. Kaplan KL, Nossel HL, Drillings M, Lesznik G. Radioimmunoassay of platelet factor 4 and beta-thromboglobulin: development and application to studies of platelet release in relation to fibrinopeptide A generation. *Br J Haematol* 1978;**39**:129–146.
120. Kunishima S, Hattori M, Kobayashi S, Hattori H, Iwama Y, Imai Y, Ogawa K, Naoe T, Ohno R. Activation and destruction of platelets in patients with rheumatic heart disease. *Eur Heart J* 1994;**15**:335–338.
121. Minamino T, Kitakaze M, Asanuma H, Ueda Y, Koretsune Y, Kuzuya T, Hori M. Plasma adenosine levels and platelet activation in patients with atrial fibrillation. *Am J Cardiol* 1999;**83**:194–198.
122. Yamauchi K, Furui H, Taniguchi N, Sotobata I. Plasma beta-thromboglobulin and platelet factor 4 concentrations in patients with atrial fibrillation. *Jpn Heart J* 1986;**27**:481–487.
123. Choudhury A, Chung I, Blann A, Lip GY. Platelet adhesion in atrial fibrillation. *Thromb Res* 2007;**120**:623–629.
124. Chirinos JA, Castrellon A, Zambrano JP, Jimenez JJ, Jy W, Horstman LL, Willens HJ, Castellanos A, Myerburg RJ, Ahn YS. Digoxin use is associated with increased platelet and endothelial cell activation in patients with nonvalvular atrial fibrillation. *Heart Rhythm* 2005;**2**:525–529.
125. Kamath S, Blann AD, Caine GJ, Gurney D, Chin BS, Lip GY. Platelet P-selectin levels in relation to plasma soluble P-selectin and beta-thromboglobulin levels in atrial fibrillation. *Stroke* 2002;**33**:1237–1242.
126. Helgason CM, Hoff JA, Kondos GT, Brace LD. Platelet aggregation in patients with atrial fibrillation taking aspirin or warfarin. *Stroke* 1993;**24**:1458–1461.
127. Müller I, Massberg S, Zierhut W, Binz C, Schuster A, Rüdiger-von Hoch S, Braun S, Gawaz M. Effects of aspirin and clopidogrel versus oral anticoagulation on platelet function and on coagulation in patients with nonvalvular atrial fibrillation (CLAFIB). *Pathophysiol Haemost Thromb* 2002;**32**:16–24.
128. Connolly S, Pogue J, Hart R, Pfeffer M, Hohnloser S, Chrolavicius S, Pfeffer M, Hohnloser S, Yusuf S. Clopidogrel plus aspirin versus oral anticoagulation for atrial fibrillation in the Atrial Fibrillation Clopidogrel Trial with Irbesartan for prevention of Vascular Events (ACTIVE W): a randomised controlled trial. *Lancet* 2006;**367**:1903–1912.
129. Sahara H, Amitani S, Kurose M, Miyahara K. Atrial fibrillation activates platelets and coagulation in a time-dependent manner: a study in patients with paroxysmal atrial fibrillation. *J Am Coll Cardiol* 1997;**29**:106–112.
130. Atalar E, Haznedaroglu IC, Acil T, Özer N, Kilic H, Övunc K, Aksoyok S, Nazli N, Kes S, Kabakçi G, Kirazli S, Özmen F. Patients with paroxysmal atrial fibrillation but not paroxysmal supraventricular tachycardia display evidence of platelet activation during arrhythmia. *Platelets* 2003;**14**:407–411.
131. Akar JG, Jeske W, Wilber DJ. Acute onset human atrial fibrillation is associated with local cardiac platelet activation and endothelial dysfunction. *J Am Coll Cardiol* 2008;**51**:1790–1793.
132. Heeringa J, Conway DSG, van der Kuip DAM, Hofman A, Breteler MMB, Lip GYH, Witteman JCM. A longitudinal population-based study of prothrombotic factors in elderly subjects with atrial fibrillation: the Rotterdam Study 1990–1999. *J Thromb Haemost* 2006;**4**:1944.
133. Minamino T, Kitakaze M, Sanada S, Asanuma H, Kurotobi T, Koretsune Y, Fukunami M, Kuzuya T, Hoki N, Hori M. Increased expression of P-selectin on platelets is a risk factor for silent cerebral infarction in patients with atrial fibrillation: role of nitric oxide. *Circulation* 1998;**98**:1721–1727.
134. Pongratz G, Brandt-Pohlmann M, Henneke KH, Pohle C, Zink D, Gehling G, Bachmann K. Platelet activation in embolic and preembolic status of patients with nonrheumatic atrial fibrillation. *Chest* 1997;**111**:929–933.
135. Roldán V, Marín F, Marco P, Climent V, Martínez JG, Monmeneu JV, Bodí V, Garri FS. Anticoagulant therapy modifies fibrinolytic dysfunction in chronic atrial fibrillation. *Pathophysiol Haemost Thromb* 2000;**30**:219–224.

136. Zeuthen EL, Lassen JF, Husted SE. Is there a hypercoagulable phase during initiation of antithrombotic therapy with oral anticoagulants in patients with atrial fibrillation? *Thromb Res* 2003;**109**:241–246.
137. Lip GYH, Rasmussen LH, Olsson SB, Jensen EC, Persson AL, Eriksson U, Wahlander KFC. Oral direct thrombin inhibitor AZD0837 for the prevention of stroke and systemic embolism in patients with non-valvular atrial fibrillation: a randomized dose-guiding, safety, and tolerability study of four doses of AZD0837 vs. vitamin K antagonists. *Eur Heart J* 2009;**30**:2897–2907.
138. Weitz JI, Connolly SJ, Patel I, Salazar D, Rohatagi S, Mendell J, Kastrissios H, Jin J, Kunitada S. Randomised, parallel-group, multicentre, multinational phase 2 study comparing edoxaban, an oral factor Xa inhibitor, with warfarin for stroke prevention in patients with atrial fibrillation. *Thromb Haemost* 2010;**104**:633–641.
139. Ezekowitz MD, Reilly PA, Nehmiz G, Simmers TA, Nagarakanti R, Parcham-Azad K, Pedersen KE, Lionetti DA, Stangier J, Wallentin L. Dabigatran with or without concomitant aspirin compared with warfarin alone in patients with nonvalvular atrial fibrillation (PETRO Study). *Am J Cardiol* 2007;**100**:1419–1426.
140. Weitz JI, Fredenburgh JC. Factors XI and XII as targets for new anticoagulants. *Front Med (Lausanne)* 2017;**4**:19.
141. Oltrona L, Broccolino M, Merlini PA, Spinola A, Pezzano A, Mannucci PM. Activation of the hemostatic mechanism after pharmacological cardioversion of acute nonvalvular atrial fibrillation. *Circulation* 1997;**95**:2003–2006.
142. Giansante C, Fiotti N, Miccio M, Altamura N, Salvi R, Guarnieri G. Coagulation indicators in patients with paroxysmal atrial fibrillation: effects of electric and pharmacologic cardioversion. *Am Heart J* 2000;**140**:423–429.
143. Hatzinikolaou-Kotsakou E, Kartasis Z, Tziakas D. Clotting state after cardioversion of atrial fibrillation: a haemostasis index could detect the relationship with the arrhythmia duration. *Thromb J* 2005;**3**:2.
144. Jacob K, Talwar S, Coppstone A, Gilbert TJ, Haywood GA. Activation of coagulation occurs after electrical cardioversion in patients with chronic atrial fibrillation despite optimal anticoagulation with warfarin. *Int J Cardiol* 2004;**95**:83–88.
145. Zeuthen EL, Lassen JF, Husted SE. Haemostatic activity in patients with atrial fibrillation treated with low-molecular-weight heparin before and after electrical cardioversion. *J Thromb Thrombolysis* 2004;**17**:185–189.
146. Boos CJ, Anderson RA, Lip GY. Is atrial fibrillation an inflammatory disorder? *Eur Heart J* 2006;**27**:136–149.
147. Hernandez Madrid A, Moro C. Atrial fibrillation and C-reactive protein: searching for local inflammation. *J Am Coll Cardiol* 2007;**49**:1649–1650.
148. Engelman MD, Svendsen JH. Inflammation in the genesis and perpetuation of atrial fibrillation. *Eur Heart J* 2005;**26**:2083–2092.
149. Gedikli O, Dogan A, Altuntas I, Altinbas A, Ozaydin M, Akturk O, Acar G. Inflammatory markers according to types of atrial fibrillation. *Int J Cardiol* 2007;**120**:193–197.
150. Bruins P, Te Velthuis H, Yazdanbakhsh AP, Jansen PG, van Hardevelt FW, de Beaumont EM, Wildevuur CR, Eijssman L, Trouwborst A, Hack CE. Activation of the complement system during and after cardiopulmonary bypass surgery: postsurgery activation involves C-reactive protein and is associated with postoperative arrhythmia. *Circulation* 1997;**96**:3542–3548.
151. Conway DS, Buggins P, Hughes E, Lip GY. Prognostic significance of raised plasma levels of interleukin-6 and C-reactive protein in atrial fibrillation. *Am Heart J* 2004;**148**:462–466.
152. Tveit A, Seljeflot I, Grundvold I, Abdelnoor M, Smith P, Arnesen H. Effect of candesartan and various inflammatory markers on maintenance of sinus rhythm after electrical cardioversion for atrial fibrillation. *Am J Cardiol* 2007;**99**:1544–1548.
153. Lip GY, Patel JV, Hughes E, Hart RG. High-sensitivity C-reactive protein and soluble CD40 ligand as indices of inflammation and platelet activation in 880 patients with nonvalvular atrial fibrillation: relationship to stroke risk factors, stroke risk stratification schema, and prognosis. *Stroke* 2007;**38**:1229–1237.
154. Cermak J, Key NS, Bach RR, Balla J, Jacob HS, Vercellotti GM. C-reactive protein induces human peripheral blood monocytes to synthesize tissue factor. *Blood* 1993;**82**:513–520.
155. Neumann F-J, Ott I, Marx N, Luther T, Kenngott S, Gawaz M, Kotsch M, Schömig A. Effect of human recombinant interleukin-6 and interleukin-8 on monocyte pro-coagulant activity. *Arterioscler Thromb Vasc Biol* 1997;**17**:3399–3405.
156. Burstein SA, Peng J, Friese P, Wolf RF, Harrison P, Downs T, Hamilton K, Comp P, Dale GL. Cytokine-induced alteration of platelet and hemostatic function. *Stem Cells* 1996;**14**:154–62.
157. Yudkin JS, Stehouwer CD, Emeis JJ, Coppack SW. C-reactive protein in healthy subjects: associations with obesity, insulin resistance, and endothelial dysfunction: a potential role for cytokines originating from adipose tissue? *Arterioscler Thromb Vasc Biol* 1999;**19**:972–978.
158. Conway DS, Buggins P, Hughes E, Lip GY. Relationship of interleukin-6 and C-reactive protein to the prothrombotic state in chronic atrial fibrillation. *J Am Coll Cardiol* 2004;**43**:2075–2082.
159. Sackner-Bernstein JD. The myocardial matrix and the development and progression of ventricular remodeling. *Curr Cardiol Rep* 2000;**2**:112–119.
160. Dollery CM, McEwan JR, Henney AM. Matrix metalloproteinases and cardiovascular disease. *Circ Res* 1995;**77**:863–868.
161. Tziakas DN, Chalikias GK, Papanas N, Stakos DA, Chatzykiakou SV, Maltezos E. Circulating levels of collagen type I degradation marker depend on the type of atrial fibrillation. *Europace* 2007;**9**:589–596.
162. Marín F, Roldán V, Climent V, García A, Marco P, Lip GYH. Is thrombogenesis in atrial fibrillation related to matrix metalloproteinase-1 and its inhibitor, TIMP-1? *Stroke* 2003;**34**:1181–1186.
163. Li X, Ma C, Dong J, Liu X, Long D, Tian Y, Yu R. The fibrosis and atrial fibrillation: is the transforming growth factor-beta 1 a candidate etiology of atrial fibrillation. *Med Hypotheses* 2008;**70**:317–319.
164. Xu J, Cui G, Esmailian F, Plunkett M, Marelli D, Ardehali A, Odim J, Laks H, Sen L. Atrial extracellular matrix remodeling and the maintenance of atrial fibrillation. *Circulation* 2004;**109**:363–368.
165. Nakano Y, Niida S, Dote K, Takenaka S, Hirao H, Miura F, Ishida M, Shingu T, Sueda T, Yoshizumi M, Chayama K. Matrix metalloproteinase-9 contributes to human atrial remodeling during atrial fibrillation. *J Am Coll Cardiol* 2004;**43**:818–825.
166. Anné W, Willems R, Roskams T, Sergeant P, Herijgers P, Holemans P, Ector H, Heidbüchel H. Matrix metalloproteinases and atrial remodeling in patients with mitral valve disease and atrial fibrillation. *Cardiovasc Res* 2005;**67**:655–666.
167. Mukherjee R, Herron AR, Lowry AS, Stroud RE, Stroud MR, Wharton JM, Ikonomidis JS, Crumbley AJ, Spiale FG, Gold MR. Selective induction of matrix metalloproteinases and tissue inhibitor of metalloproteinases in atrial and ventricular myocardium in patients with atrial fibrillation. *Am J Cardiol* 2006;**97**:532–537.
168. Arndt M, Lendeckel U, Röcken C, Nepple K, Wolke C, Spiess A, Huth C, Ansorge S, Klein HU, Goette A. Altered expression of ADAMs (A Disintegrin And Metalloproteinase) in fibrillating human atria. *Circulation* 2002;**105**:720–725.
169. Lijnen HR. Molecular interactions between the plasminogen/plasmin and matrix metalloproteinase systems. *Fibrinolysis Proteolysis* 2000;**14**:175–181.
170. Gramley F, Lorenzen J, Plisene J, Rakauskas M, Benetis R, Schmid M, Autschbach R, Knackstedt C, Schimpf T, Mischke K, Gressner A, Hanrath P, Kelm M, Schauer P. Decreased plasminogen activator inhibitor and tissue metalloproteinase inhibitor expression may promote increased metalloproteinase activity with increasing duration of human atrial fibrillation. *J Cardiovasc Electrophysiol* 2007;**18**:1076–1082.
171. Davis ME, Cai H, Drummond GR, Harrison DG. Shear stress regulates endothelial nitric oxide synthase expression through c-Src by divergent signaling pathways. *Circ Res* 2001;**89**:1073–1080.
172. Freedman JE, Loscalzo J, Barnard MR, Alpert C, Keaney JF, Michelson AD. Nitric oxide released from activated platelets inhibits platelet recruitment. *J Clin Invest* 1997;**100**:350–356.
173. Swiatkowska M, Cierniewska-Cieslak A, Pawlowska Z, Cierniewski CS. Dual regulatory effects of nitric oxide on plasminogen activator inhibitor type 1 expression in endothelial cells. *Eur J Biochem* 2000;**267**:1001–1007.
174. Cai H, Li Z, Goette A, Mera F, Honeycutt C, Feretik K, Wilcox JN, Dudley SC, Harrison DG, Langberg JJ. Downregulation of endocardial nitric oxide synthase expression and nitric oxide production in atrial fibrillation: potential mechanisms for atrial thrombosis and stroke. *Circulation* 2002;**106**:2854–2858.
175. Goette A, Staack T, Röcken C, Arndt M, Geller JC, Huth C, Ansorge S, Klein HU, Lendeckel U. Increased expression of extracellular signal-regulated kinase and angiotensin-converting enzyme in human atria during atrial fibrillation. *J Am Coll Cardiol* 2000;**35**:1669–1677.
176. Choudhury A, Varughese GI, Lip GY. Targeting the renin-angiotensin-aldosterone-system in atrial fibrillation: a shift from electrical to structural therapy? *Expert Opin Pharmacother* 2005;**6**:2193–2207.
177. Healey JS, Baranchuk A, Crystal E, Morillo CA, Garfinkle M, Yusuf S, Connolly SJ. Prevention of atrial fibrillation with angiotensin-converting enzyme inhibitors and angiotensin receptor blockers: a meta-analysis. *J Am Coll Cardiol* 2005;**45**:1832–1839.
178. Das UN. Is angiotensin-II an endogenous pro-inflammatory molecule? *Med Sci Monit* 2005;**11**:Ra155–Ra162.
179. Tamarat R, Silvestre JS, Durie M, Levy BI. Angiotensin II angiogenic effect *in vivo* involves vascular endothelial growth factor- and inflammation-related pathways. *Lab Invest* 2002;**82**:747–756.
180. Suzuki Y, Ruiz-Ortega M, Lorenzo O, Ruperez M, Esteban V, Egido J. Inflammation and angiotensin II. *Int J Biochem Cell Biol* 2003;**35**:881–900.
181. Cardin S, Li D, Thorin-Trescases N, Leung TK, Thorin E, Nattel S. Evolution of the atrial fibrillation substrate in experimental congestive heart failure: angiotensin-dependent and -independent pathways. *Cardiovasc Res* 2003;**60**:315–325.
182. Takagishi T, Murahashi N, Azagami S, Morimatsu M, Sasaguri Y. Effect of angiotensin II and thromboxane A2 on the production of matrix metalloproteinase by human aortic smooth muscle cells. *Biochem Mol Biol Int* 1995;**35**:265–273.
183. Griendling KK, Alexander RW. Oxidative stress and cardiovascular disease. *Circulation* 1997;**96**:3264–3265.
184. Dzau VJ, Bernstein K, Celermaier D, Cohen J, Dahlöf B, Deanfield J, Diez J, Drexler H, Ferrari R, van Gilst W, Hansson L, Hornig B, Husan A, Johnston C, Lazar H, Lonn E, Lüscher T, Mancini J, Mimran A, Pepine C, Rabelink T, Remme W, Ruilope L, Ruzicka M, Schunkert H, Swedberg K, Unger T, Vaughan D, Weber M. The relevance of tissue angiotensin-converting enzyme: manifestations in mechanistic and endpoint data. *Am J Cardiol* 2001;**88**:11–20.

185. Wachtell K, Horneštam B, Lehto M, Slotwiner DJ, Gerdtz E, Olsen MH, Aurup P, Dahlöf B, Ibsen H, Julius S, Kjeldsen SE, Lindholm LH, Nieminen MS, Rokkedal J, Devereux RB. Cardiovascular morbidity and mortality in hypertensive patients with a history of atrial fibrillation: the Losartan Intervention For End Point Reduction in Hypertension (LIFE) study. *J Am Coll Cardiol* 2005;**45**:705–711.
186. Freedman MD. Oral anticoagulants: pharmacodynamics, clinical indications and adverse effects. *J Clin Pharmacol* 1992;**32**:196–209.
187. Li Z, Wu J, Mammen EF. Prothrombin fragment F1+2 and oral anticoagulant therapy. *Thromb Res* 1994;**75**:601–607.
188. Hapgood G, Butler J, Malan E, Chunalil S, Tran H. The effect of dabigatran on the activated partial thromboplastin time and thrombin time as determined by the Hemoclot thrombin inhibitor assay in patient plasma samples. *Thromb Haemost* 2013;**110**:308–315.
189. Samama MM, Contant G, Spiro TE, Perzborn E, Le Flem L, Guinet C, Gourmelin Y, Rohde G, Martinoli J-L. Laboratory assessment of rivaroxaban: a review. *Thromb J* 2013;**11**:11.
190. Shin H, Cho M-C, Kim RB, Kim C-H, Choi N-C, Kim S-K, Koh E-H. Laboratory measurement of apixaban using anti-factor Xa assays in acute ischemic stroke patients with non-valvular atrial fibrillation. *J Thromb Thrombolysis* 2018;**45**:250–256.
191. Chan L, Pisano M. Edoxaban (Savaysa): a factor Xa inhibitor. *P T* 2015;**40**:651–695.
192. Warner TD, Nylander S, Whatling C. Anti-platelet therapy: cyclo-oxygenase inhibition and the use of aspirin with particular regard to dual anti-platelet therapy. *Br J Clin Pharmacol* 2011;**72**:619–633.
193. Tohgi H, Konno S, Tamura K, Kimura B, Kawano K. Effects of low-to-high doses of aspirin on platelet aggregability and metabolites of thromboxane A2 and prostacyclin. *Stroke* 1992;**23**:1400–1403.
194. Coppinger JA, O'Connor R, Wynne K, Flanagan M, Sullivan M, Maguire PB, Fitzgerald DJ, Cagney G. Moderation of the platelet releasate response by aspirin. *Blood* 2007;**109**:4786–4792.
195. Cattaneo M. Response variability to clopidogrel: is tailored treatment, based on laboratory testing, the right solution? *J Thromb Haemost* 2012;**10**:327–336.
196. Birkeland K, Parra D, Rosenstein R. Antiplatelet therapy in acute coronary syndromes: focus on ticagrelor. *J Blood Med* 2010;**1**:197–219.
197. Wiviott SD, Braunwald E, McCabe CH, Montalescot G, Ruzyllo W, Gottlieb S, Neumann F-J, Ardissino D, De Servi S, Murphy SA, Riesmeyer J, Weerakkody G, Gibson CM, Antman EM. Prasugrel versus clopidogrel in patients with acute coronary syndromes. *N Engl J Med* 2007;**357**:2001–2015.
198. Hijazi Z, Oldgren J, Siegbahn A, Wallentin L. Application of biomarkers for risk stratification in patients with atrial fibrillation. *Clin Chem* 2017;**63**:152–164.
199. Hijazi Z, Lindbäck J, Alexander JH, Hanna M, Held C, Hylek EM, Lopes RD, Oldgren J, Siegbahn A, Stewart RAH, White HD, Granger CB, Wallentin L. The ABC (age, biomarkers, clinical history) stroke risk score: a biomarker-based risk score for predicting stroke in atrial fibrillation. *Eur Heart J* 2016;**37**:1582–1590.
200. Oldgren J, Hijazi Z, Lindbäck J, Alexander JH, Connolly SJ, Eikelboom JW, Ezekowitz MD, Granger CB, Hylek EM, Lopes RD, Siegbahn A, Yusuf S, Wallentin L. Performance and validation of a novel biomarker-based stroke risk score for atrial fibrillation. *Circulation* 2016;**134**:1697–1707.
201. Rivera-Caravaca JM, Roldán V, Esteve-Pastor MA. Long-term stroke risk prediction in patients with atrial fibrillation: comparison of the ABC-stroke and CHA<sub>2</sub>DS<sub>2</sub>-VASc scores. *J Am Heart Assoc* 2017;**6**:e006490.
202. Roldán V, Rivera-Caravaca JM, Shantsila A, García-Fernández A, Esteve-Pastor MA, Vilchez JA, Romera M, Valdés M, Vicente V, Marín F, Lip GYH. Enhancing the 'real world' prediction of cardiovascular events and major bleeding with the CHA<sub>2</sub>DS<sub>2</sub>-VASc and HAS-BLED scores using multiple biomarkers. *Ann Med* 2018;**50**:26–34.
203. Hijazi Z, Oldgren J, Lindbäck J, Alexander JH, Connolly SJ, Eikelboom JW, Ezekowitz MD, Held C, Hylek EM, Lopes RD, Siegbahn A, Yusuf S, Granger CB, Wallentin L. The novel biomarker-based ABC (age, biomarkers, clinical history)-bleeding risk score for patients with atrial fibrillation: a derivation and validation study. *Lancet* 2016;**387**:2302–2311.
204. Esteve-Pastor MA, Rivera-Caravaca JM, Roldán V. Long-term bleeding risk prediction in 'real world' patients with atrial fibrillation: comparison of the HAS-BLED and ABC-Bleeding risk scores. The Murcia Atrial Fibrillation Project. *Thromb Haemost* 2017;**117**:1848–1858.
205. Tzikas S, Palapies L, Bakogiannis C, Zeller T, Sinning C, Baldus S, Bickel C, Vassilikos V, Lackner KJ, Zeiher A, Münzel T, Blankenberg S, Keller T. GDF-15 predicts cardiovascular events in acute chest pain patients. *PLoS One* 2017;**12**:e0182314.
206. George M, Jena A, Srivatsan V, Muthukumar R, Dhandapani VE. GDF 15—a novel biomarker in the offing for heart failure. *Curr Cardiol Rev* 2016;**12**:37–46.
207. Kempf T, Sinning J-M, Quint A, Bickel C, Sinning C, Wild PS, Schnabel R, Lubos E, Rupprecht HJ, Münzel T, Drexler H, Blankenberg S, Wollert KC. Growth-differentiation factor-15 for risk stratification in patients with stable and unstable coronary heart disease: results from the AtheroGene study. *Circ Cardiovasc Genet* 2009;**2**:286–292.
208. Ban N, Siegfried CJ, Lin JB, Shui YB, Sein J, Pita-Thomas W, Sene A, Santeford A, Gordon M, Lamb R, Dong Z, Kelly SC, Cavalli V, Yoshino J, Apte RS. GDF15 is elevated in mice following retinal ganglion cell death and in glaucoma patients. *JCI Insight* 2017;**2**:e91455.
209. Chao T-F, Lip GYH, Liu C-J, Lin Y-J, Chang S-L, Lo L-W, Hu Y-F, Tuan T-C, Liao J-N, Chung F-P, Chen T-J, Chen S-A. Relationship of aging and incident comorbidities to stroke risk in patients with atrial fibrillation. *J Am Coll Cardiol* 2018;**71**:122–132.
210. Yoon M, Yang P-S, Jang E, Yu HT, Kim T-H, Uhm J-S, Kim J-Y, Pak H-N, Lee M-H, Lip GYH, Joung B. Dynamic changes of CHA<sub>2</sub>DS<sub>2</sub>-VASc score and the risk of ischaemic stroke in asian patients with atrial fibrillation: a nationwide cohort study. *Thromb Haemost* 2018;**118**:1296–1304.
211. Chao T-F, Lip GYH, Lin Y-J, Chang S-L, Lo L-W, Hu Y-F, Tuan T-C, Liao J-N, Chung F-P, Chen T-J, Chen S-A. Incident risk factors and major bleeding in patients with atrial fibrillation treated with oral anticoagulants: a comparison of baseline, follow-up and delta HAS-BLED scores with an approach focused on modifiable bleeding risk factors. *Thromb Haemost* 2018;**118**:768–777.
212. Hijazi Z, Oldgren J, Andersson U, Connolly SJ, Ezekowitz MD, Hohnloser SH, Reilly PA, Siegbahn A, Yusuf S, Wallentin L. Importance of persistent elevation of cardiac biomarkers in atrial fibrillation: a RE-LY substudy. *Heart* 2014;**100**:1193–1200.
213. Wannamethee SG, Whincup PH, Papacosta O, Lennon L, Lowe GD. Associations between blood coagulation markers, NT-proBNP and risk of incident heart failure in older men: the British Regional Heart Study. *Int J Cardiol* 2017;**230**:567–571.
214. Sadanaga T, Mitamura H. High B-type natriuretic peptide levels predict a hypercoagulable state in otherwise low-risk patients with atrial fibrillation. *J Arrhythm* 2013;**29**:244–246.
215. Matusik PT, Matusik PS, Kornacewicz-Jach Z, Małeczka B, Ząbek A, Undas A. Elevated NT-proBNP is associated with unfavorably altered plasma fibrin clot properties in atrial fibrillation. *Int J Cardiol* 2017;**243**:244–250.
216. Okada Y, Shibazaki K, Kimura K, Matsumoto N, Iguchi Y, Aoki J, Kobayashi K, Sakai K. Brain natriuretic peptide is a marker associated with thrombus in stroke patients with atrial fibrillation. *J Neurol Sci* 2011;**301**:86–89.
217. Maruyama K, Uchiyama S, Shiga T, Iijima M, Ishizuka K, Hoshino T, Kitagawa K. Brain natriuretic peptide is a powerful predictor of outcome in stroke patients with atrial fibrillation. *Cerebrovasc Dis Extra* 2017;**7**:35–43.
218. Rivera-Caravaca JM, Roldán V, Romera M, Esteve-Pastor MA, Valdés M, Lip GYH, Vicente V, Marín F. Soluble fibrin monomer complex and prediction of cardiovascular events in atrial fibrillation: the observational murcia atrial fibrillation project. *J Gen Intern Med* 2018;**33**:847–854.
219. Lip GY. Stroke and bleeding risk assessment in atrial fibrillation: when, how, and why? *Eur Heart J* 2013;**34**:1041–1049.
